# Supplementary material for: Molecular characterization of systemic sclerosis esophageal pathology identifies inflammatory and proliferative signatures
Source: PubMed Central journal article supplement (PMC4518531; doi:10.1186/s13075-015-0695-1), 2015-07-29
Supplement: 13075_2015_695_MOESM1_ESM.pdf [file 13075_2015_695_MOESM1_ESM.pdf]

**Table S1:** Subjects and biopsy time points

| Study Code | EGD Indication                                                    | Age/Sex | Ethnicity | Diagnosis       | PPI duration (months) | Current PPI                     | SSc therapy | Sci-70 | RNA Pol III | ACA |
|------------|-------------------------------------------------------------------|---------|-----------|-----------------|-----------------------|---------------------------------|-------------|--------|-------------|-----|
| Eso1       | dysphagia                                                         | 50/F    | White     | Schatzki's ring | 0                     | None                            | N/A         | N/A    | N/A         | N/A |
| Eso2       | heartburn, upper abdominal pain                                   | 78/F    | White     | Lupus with GER  | 95                    | dexlansoprazole                 | N/A         | N/A    | N/A         | N/A |
| Eso3       | iron deficiency anemia                                            | 45/F    | Black     | Anemia          | 0                     | None                            | N/A         | N/A    | N/A         | N/A |
| Eso4       | nausea with vomiting                                              | 24/M    | Hispanic  | GER             | 0                     | None                            | N/A         | N/A    | N/A         | N/A |
| Eso5       | epigastric abdominal pain, weight loss                            | 31/F    | White     | SA with GER     | 66                    | esomeprazole                    | N/A         | N/A    | N/A         | N/A |
| Eso6       | GER follow-up, intestinal metaplasia of gastroesophageal junction | 34/M    | White     | GER             | 156                   | omeprazole                      | N/A         | N/A    | N/A         | N/A |
| Eso7       | heartburn, dysphagia                                              | 24/F    | White     | GER             | 84                    | omeprazole                      | N/A         | N/A    | N/A         | N/A |
| SScEso1*   | refractory GER abdominal pain                                     | 52/F    | White     | dSSc            | 40                    | dexlansoprazole                 | Stem Cell   | -      | +           | -   |
| SScEso2    | abdominal pain, dysphagia                                         | 30/F    | Hispanic  | dSSc            | 22                    | omeprazole                      | None        | +      | N/A         | -   |
| SScEso3    | dysphagia                                                         | 49/F    | White     | dSSc            | 32                    | esomeprazole                    | MMF         | -      | +           | -   |
| SScEso4    | dysphagia                                                         | 53/F    | White     | ISSc            | 60                    | esomeprazole                    | None        | -      | -           | +   |
| SScEso5    | GER                                                               | 58/F    | White     | ISSc            | 16                    | lansoprazole                    | None        | -      | -           | -   |
| SScEso6    | heartburn, dysphagia, regurgitation                               | 63/M    | White     | ISSc            | 57                    | dexlansoprazole<br>lansoprazole | MMF         | -      | N/A         | -   |
| SScEso8    | heartburn, dysphagia                                              | 50/F    | Asian     | dSSc            | 25                    | lansoprazole                    | MMF         | -      | -           | -   |
| SScEso9    | dysphagia, GER                                                    | 52/F    | White     | ISSc            | 97                    | dexlansoprazole                 | None        | +      | -           | -   |
| SScEso11   | heartburn, dysphagia, anemia, weight loss                         | 68/F    | White     | dSSc            | 13                    | pantoprazole                    | None        | +      | -           | -   |
| SScEso12   | gastric arteriovenous malformation                                | 49/F    | White     | dSSc            | 4                     | pantoprazole                    | MMF         | -      | +           | -   |
| SScEso13   | heartburn, dysphagia                                              | 47/F    | White     | ISSc            | 289                   | omeprazole                      | MMF         | +      | -           | -   |
| SScEso14   | iron deficiency anemia, GAVE                                      | 46/F    | Mixed     | dSSc            | 23                    | omeprazole                      | MMF         | -      | +           | -   |

|          |                                                    |      |          |      |     |                 |      |   |   |   |
|----------|----------------------------------------------------|------|----------|------|-----|-----------------|------|---|---|---|
| SScEso15 | left upper quadrant abdominal pain established GER | 50/F | Hispanic | dSSc | 87  | dexlansoprazole | None | - | + | - |
| SScEso17 | heartburn, GER follow-up                           | 67/F | White    | ISSc | 118 | esomeprazole    | None | + | - | - |
| SScEso18 | heartburn, dysphagia, iron deficiency anemia       | 51/F | Black    | dSSc | 48  | esomeprazole    | MMF  | - | + | - |
| SScEso19 | dysphagia                                          | 51/F | White    | dSSc | 96  | esomeprazole    | None | + | - | - |

EGD=esophagogastroduodenoscopy, PPI=proton pump inhibition, SSc=systemic sclerosis, Scl-70=anti-topoisomerase I, RNA Pol III=RNA polymerase III, ACA=anticentromere serum autoantibodies, GER=gastroesophageal reflux disease, SA=spondyloarthritis, dSSc=diffuse cutaneous, ISSc=limited cutaneous SSc, N/A=not available, MMF=mycophenolate mofetil. \*indicates baseline and 6mo sample obtained.
