# Supplementary material for: Molecular characterization of systemic sclerosis esophageal pathology identifies inflammatory and proliferative signatures
Source: PubMed Central journal article supplement (PMC4518531; doi:10.1186/s13075-015-0695-1), 2015-07-29

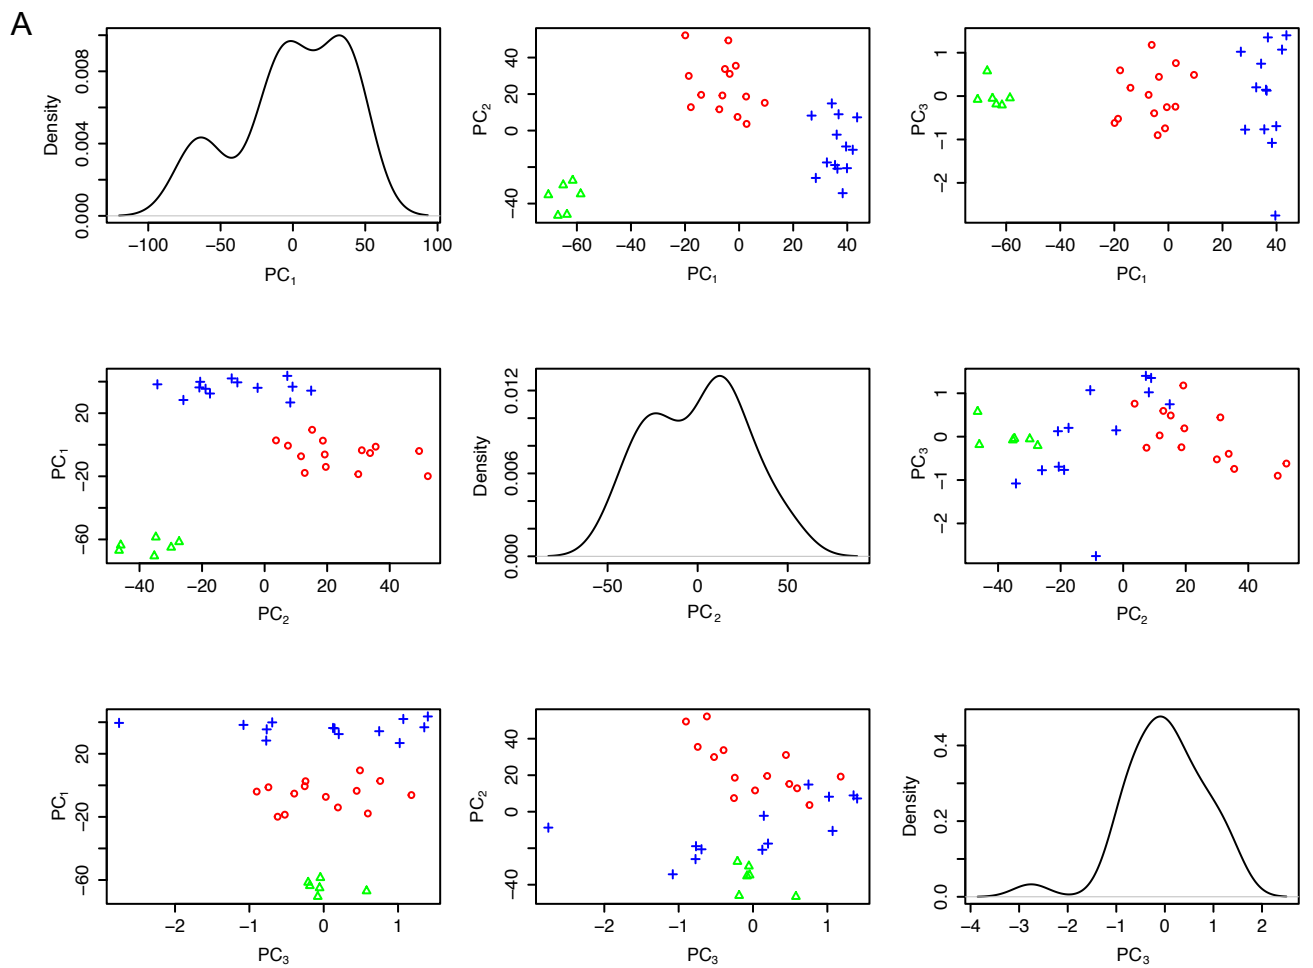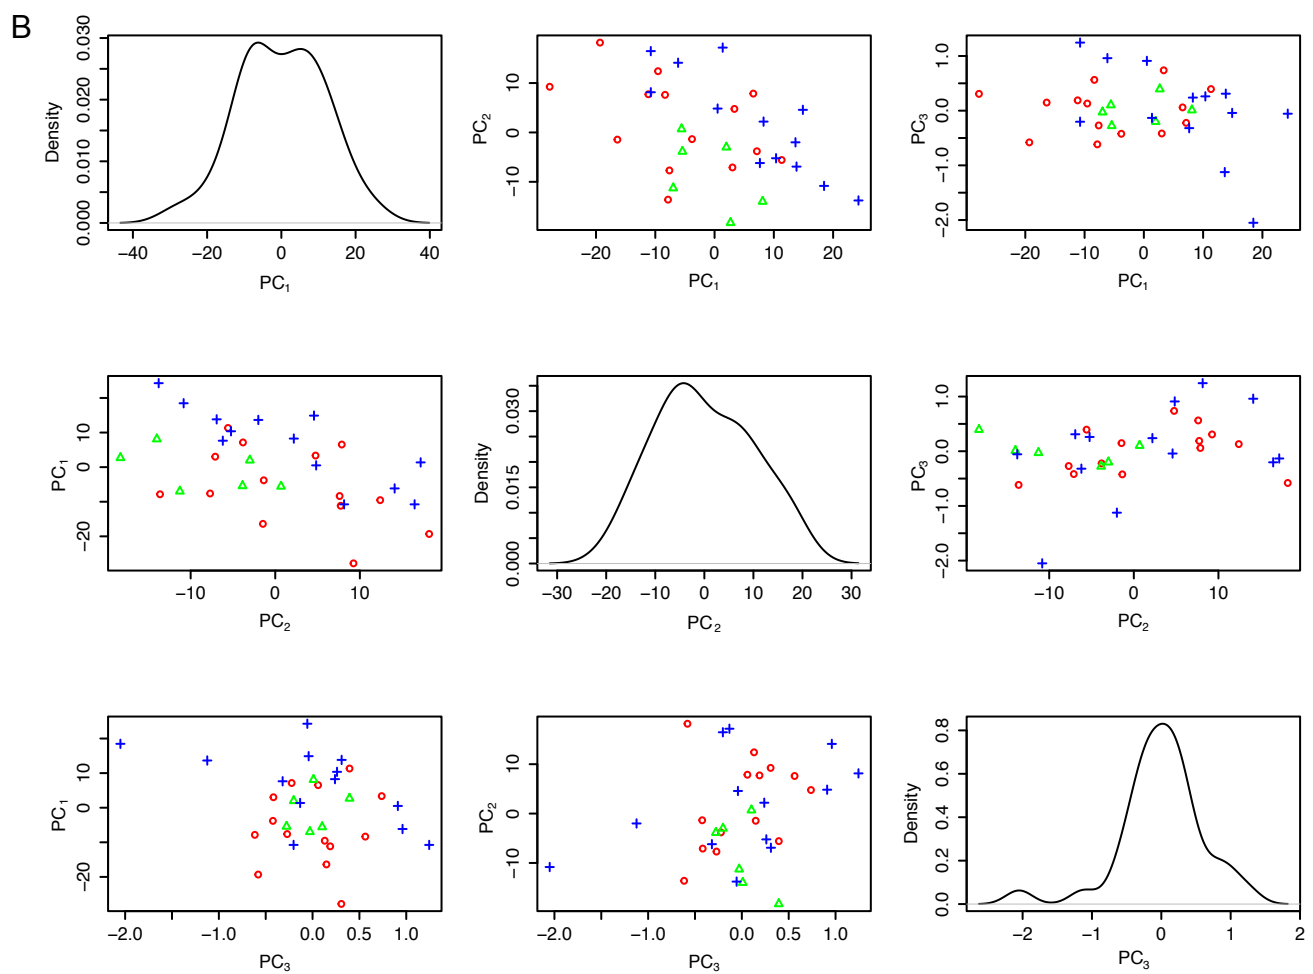

Supplement: 13075_2015_695_MOESM2_ESM.pdf [file 13075_2015_695_MOESM2_ESM.pdf]
