# Supplementary material for: Molecular characterization of systemic sclerosis esophageal pathology identifies inflammatory and proliferative signatures
Source: PubMed Central journal article supplement (PMC4518531; doi:10.1186/s13075-015-0695-1), 2015-07-29
Supplement: 13075_2015_695_MOESM3_ESM.pdf [file 13075_2015_695_MOESM3_ESM.pdf]

**Table S2:** Human qRT-PCR primers (5'-3')

---

|        |         |                       |
|--------|---------|-----------------------|
| SOCS3  | Forward | CCTGCGCCTCAAGACCTTC   |
|        | Reverse | GTCACTGCGCTCCAGTAGAA  |
| CRISP2 | Forward | GGAGCAGAGAGGTAACAACGA |
|        | Reverse | TTGTACTGGTTTTGCGGTCCT |
