# Supplementary material for: Molecular characterization of systemic sclerosis esophageal pathology identifies inflammatory and proliferative signatures
Source: PubMed Central journal article supplement (PMC4518531; doi:10.1186/s13075-015-0695-1), 2015-07-29
Supplement: 13075_2015_695_MOESM4_ESM.pdf [file 13075_2015_695_MOESM4_ESM.pdf]

**A**

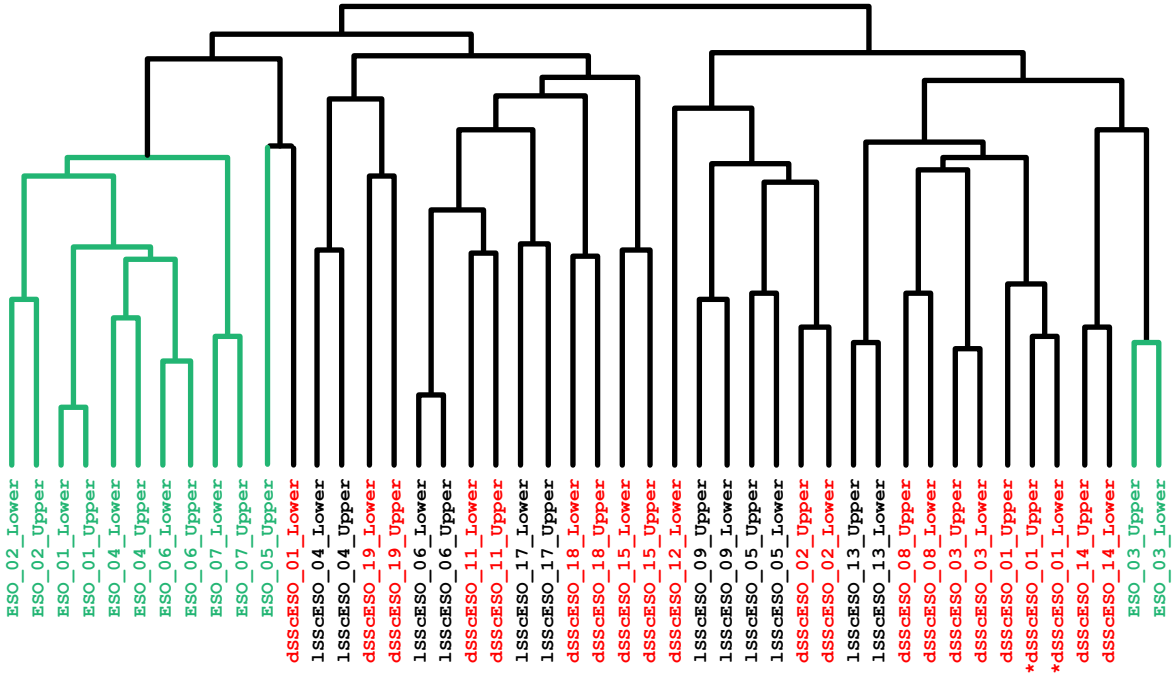

**B**

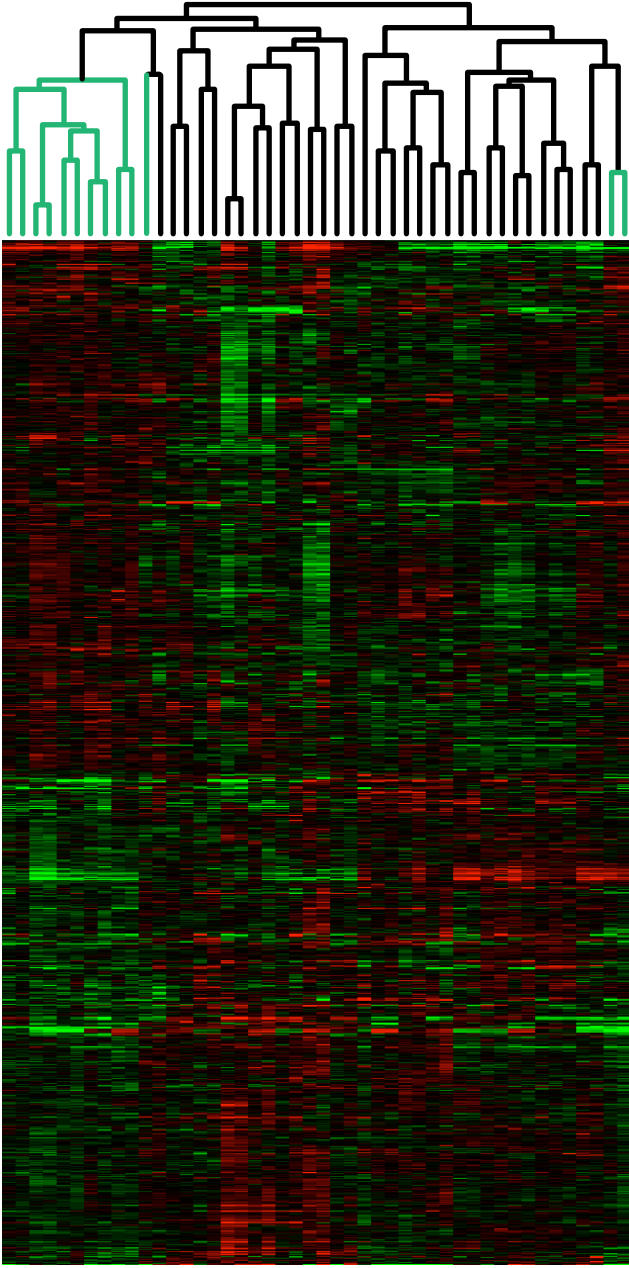

- |                 |                                                             |
|-----------------|-------------------------------------------------------------|
| <b>TRAF4</b>    | <b>TNF receptor-associated factor 4</b>                     |
| <b>IGF2R</b>    | <b>insulin-like growth factor 2 receptor</b>                |
| <b>CD2BP2</b>   | <b>CD2 antigen (cytoplasmic tail) binding protein 2</b>     |
| <br>            |                                                             |
| <b>TGFB1</b>    | Transforming growth factor, beta-induced, 68kDa             |
| <b>TNFRSF1A</b> | Tumor necrosis factor receptor superfamily, member 1A       |
| <br>            |                                                             |
| <b>MADCAM1</b>  | <b>mucosal vascular addressin cell adhesion molecule 1</b>  |
| <b>CCL4</b>     | <b>chemokine (C-C motif) ligand 4</b>                       |
| <b>THBS1</b>    | <b>thrombospondin 1</b>                                     |
| <br>            |                                                             |
| <b>IFI27</b>    | Interferon, alpha-inducible protein 27                      |
| <br>            |                                                             |
| <b>IFIT5</b>    | Interferon-induced protein with tetratricopeptide repeats 5 |
