# Supplementary material for: Molecular characterization of systemic sclerosis esophageal pathology identifies inflammatory and proliferative signatures
Source: PubMed Central journal article supplement (PMC4518531; doi:10.1186/s13075-015-0695-1), 2015-07-29
Supplement: 13075_2015_695_MOESM6_ESM.pdf [file 13075_2015_695_MOESM6_ESM.pdf]

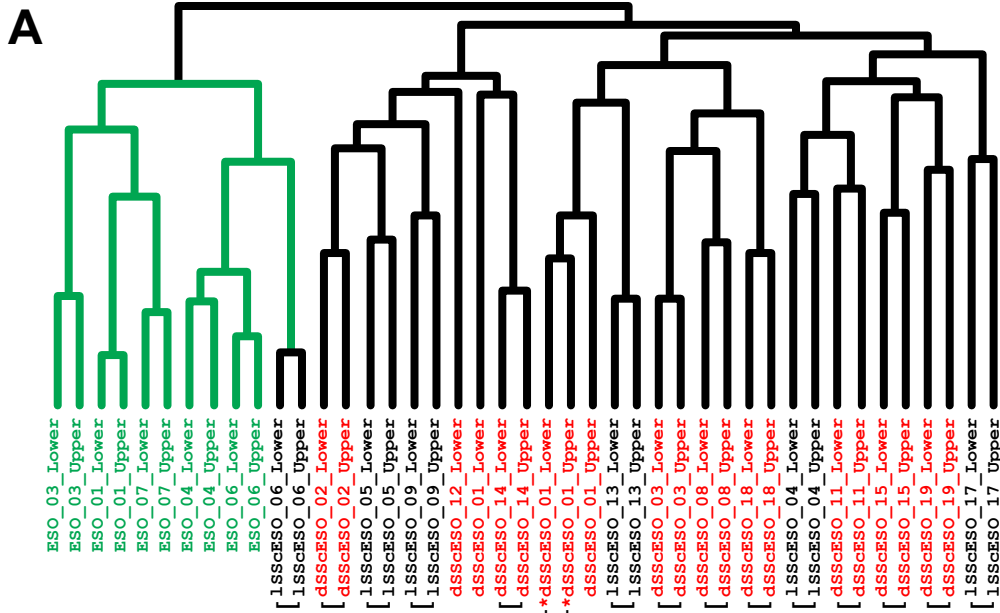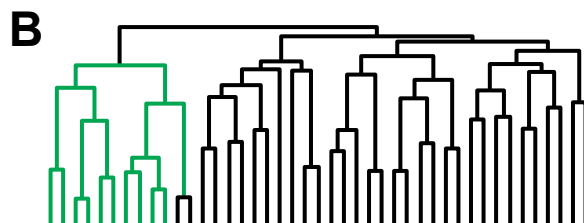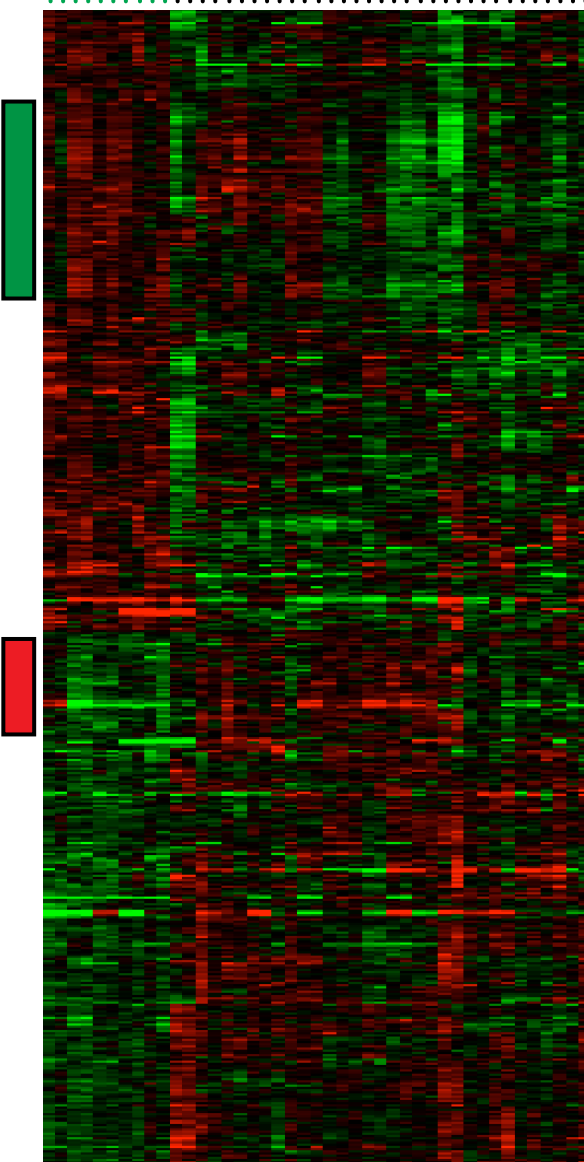

- |          |                                                            |
|----------|------------------------------------------------------------|
| IRAK1    | interleukin-1 receptor-associated kinase 1                 |
| TAB1     | TGF-beta activated kinase 1/MAP3K7 binding protein 1       |
| RELA     | v-rel avian reticuloendotheliosis viral oncogene homolog A |
| FADD     | Fas (TNFRSF6)-associated via death domain                  |
| LAMP1    | lysosomal-associated membrane protein 1                    |
| VPS11    | vacuolar protein sorting 11 homolog (S. cerevisiae)        |
| IGF2R    | insulin-like growth factor 2 receptor                      |
|          |                                                            |
| HLA-DQA2 | major histocompatibility complex, class II, DQ alpha 2     |
| HLA-DPB1 | major histocompatibility complex, class II, DP beta 1      |
| HLA-DPA1 | major histocompatibility complex, class II, DP alpha 1     |
| HLA-DOA  | major histocompatibility complex, class II, DO alpha       |
|          |                                                            |
| CCL2     | chemokine (C-C motif) ligand 2                             |
| LTBP3    | latent transforming growth factor beta binding protein 3   |
| MADCAM1  | mucosal vascular addressin cell adhesion molecule 1        |
| FGFR1    | fibroblast growth factor receptor 1                        |
| CD59     | CD59 molecule, complement regulatory protein               |
| CCL4     | chemokine (C-C motif) ligand 4                             |
| THBS1    | thrombospondin 1                                           |
|          |                                                            |
| IL27     | interleukin 27                                             |
| IFNAR1   | interferon (alpha, beta and omega) receptor 1              |
| PDGFRA   | platelet-derived growth factor receptor, alpha polypeptide |
