# Supplementary material for: Molecular characterization of systemic sclerosis esophageal pathology identifies inflammatory and proliferative signatures
Source: PubMed Central journal article supplement (PMC4518531; doi:10.1186/s13075-015-0695-1), 2015-07-29
Supplement: 13075_2015_695_MOESM8_ESM.pdf [file 13075_2015_695_MOESM8_ESM.pdf]

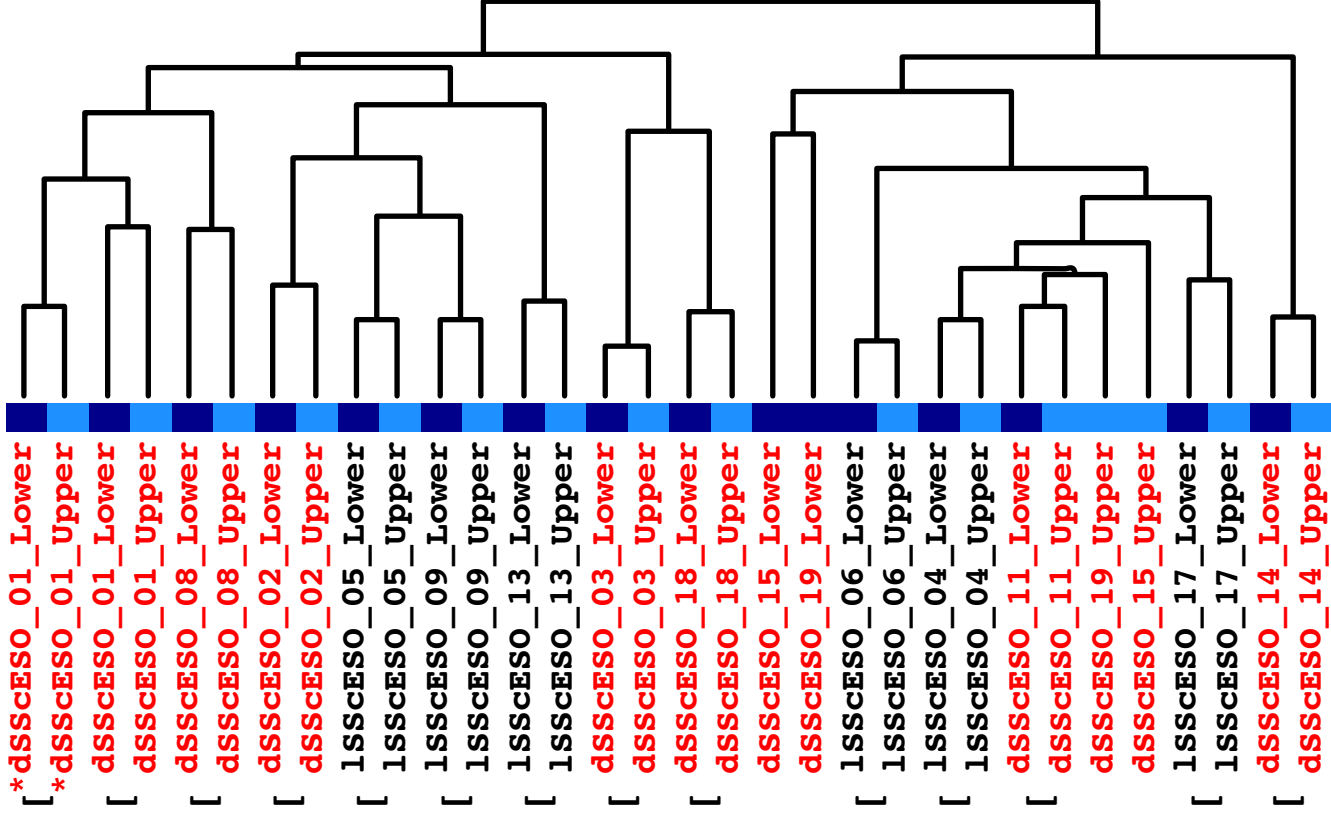

Lower  
Upper

\*dSScES0\_01\_Lower  
\*dSScES0\_01\_Upper  
[ dSScES0\_01\_Lower  
[ dSScES0\_01\_Upper  
[ dSScES0\_08\_Lower  
[ dSScES0\_08\_Upper  
[ dSScES0\_02\_Lower  
[ dSScES0\_02\_Upper  
[ lSScES0\_05\_Lower  
[ lSScES0\_05\_Upper  
[ lSScES0\_09\_Lower  
[ lSScES0\_09\_Upper  
[ lSScES0\_13\_Lower  
[ lSScES0\_13\_Upper  
[ dSScES0\_03\_Lower  
[ dSScES0\_03\_Upper  
[ dSScES0\_18\_Lower  
[ dSScES0\_18\_Upper  
[ dSScES0\_15\_Lower  
[ dSScES0\_19\_Lower  
[ lSScES0\_06\_Lower  
[ lSScES0\_06\_Upper  
[ lSScES0\_04\_Lower  
[ lSScES0\_04\_Upper  
[ dSScES0\_11\_Lower  
[ dSScES0\_11\_Upper  
[ dSScES0\_19\_Upper  
[ dSScES0\_15\_Upper  
[ lSScES0\_17\_Lower  
[ lSScES0\_17\_Upper  
[ dSScES0\_14\_Lower  
[ dSScES0\_14\_Upper
