# Supplementary material for: Molecular characterization of systemic sclerosis esophageal pathology identifies inflammatory and proliferative signatures
Source: PubMed Central journal article supplement (PMC4518531; doi:10.1186/s13075-015-0695-1), 2015-07-29
Supplement: 13075_2015_695_MOESM9_ESM.pdf [file 13075_2015_695_MOESM9_ESM.pdf]

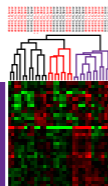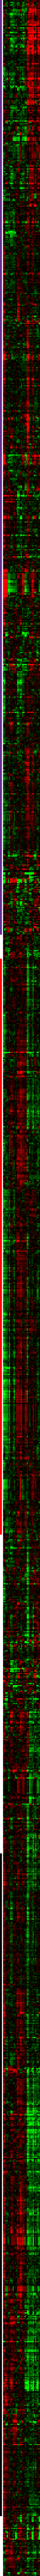

The following text is a dense, repetitive sequence of characters and symbols, likely representing a corrupted document or a specific type of data visualization. The text is mostly illegible due to the high density and repetition of characters.
