# Supplementary material for: Molecular characterization of systemic sclerosis esophageal pathology identifies inflammatory and proliferative signatures
Source: PubMed Central journal article supplement (PMC4518531; doi:10.1186/s13075-015-0695-1), 2015-07-29
Supplement: 13075_2015_695_MOESM12_ESM.pdf [file 13075_2015_695_MOESM12_ESM.pdf]

**Table S4:****Functional Enrichment Results, Fig 5 Red Cluster**

| <b>p-value</b> | <b>term ID</b> | <b>term name</b>                                                 |
|----------------|----------------|------------------------------------------------------------------|
| 2.63E-02       | GO:0071495     | cellular response to endogenous stimulus                         |
| 2.20E-04       | GO:0070848     | response to growth factor stimulus                               |
| 4.83E-03       | GO:0071310     | cellular response to organic substance                           |
| 3.28E-04       | GO:0071363     | cellular response to growth factor stimulus                      |
| 1.79E-02       | GO:0032870     | cellular response to hormone stimulus                            |
| 2.06E-04       | GO:0007167     | enzyme linked receptor protein signaling pathway                 |
| 5.44E-05       | GO:0007169     | transmembrane receptor protein tyrosine kinase signaling pathway |
| 3.40E-02       | GO:0038127     | ERBB signaling pathway                                           |
| 2.78E-02       | GO:0007173     | epidermal growth factor receptor signaling pathway               |
| 9.35E-06       | GO:0038179     | neurotrophin signaling pathway                                   |
| 8.27E-06       | GO:0048011     | neurotrophin TRK receptor signaling pathway                      |
| 3.66E-02       | GO:0006650     | glycerophospholipid metabolic process                            |
| 1.39E-02       | GO:0030518     | intracellular steroid hormone receptor signaling pathway         |
| 2.89E-02       | GO:0044281     | small molecule metabolic process                                 |
| 2.52E-02       | GO:0016236     | macroautophagy                                                   |
| 5.89E-03       | GO:0038093     | Fc receptor signaling pathway                                    |
| 2.74E-04       | GO:0043632     | modification-dependent macromolecule catabolic process           |
| 1.28E-12       | GO:0008150     | biological_process                                               |
| 4.96E-07       | GO:0044699     | single-organism process                                          |
| 7.21E-06       | GO:0016265     | death                                                            |
| 8.58E-12       | GO:0065007     | biological regulation                                            |
| 2.88E-03       | GO:0065009     | regulation of molecular function                                 |
| 4.86E-02       | GO:0044093     | positive regulation of molecular function                        |
| 1.97E-20       | GO:0009987     | cellular process                                                 |
| 1.07E-09       | GO:0044763     | single-organism cellular process                                 |
| 3.01E-02       | GO:0007163     | establishment or maintenance of cell polarity                    |
| 1.16E-03       | GO:0007154     | cell communication                                               |
| 5.66E-03       | GO:0030029     | actin filament-based process                                     |
| 3.30E-10       | GO:0007049     | cell cycle                                                       |
| 2.44E-05       | GO:0000278     | mitotic cell cycle                                               |
| 6.32E-06       | GO:0008219     | cell death                                                       |
| 2.98E-05       | GO:0012501     | programmed cell death                                            |
| 2.50E-05       | GO:0006915     | apoptotic process                                                |
| 1.16E-04       | GO:0022402     | cell cycle process                                               |
| 1.41E-02       | GO:0044770     | cell cycle phase transition                                      |

|          |            |                                                              |
|----------|------------|--------------------------------------------------------------|
| 1.41E-17 | GO:0008152 | metabolic process                                            |
| 2.36E-21 | GO:0044238 | primary metabolic process                                    |
| 2.02E-20 | GO:0071704 | organic substance metabolic process                          |
| 3.75E-11 | GO:1901360 | organic cyclic compound metabolic process                    |
| 4.97E-17 | GO:0043170 | macromolecule metabolic process                              |
| 5.92E-08 | GO:0010467 | gene expression                                              |
| 2.59E-22 | GO:0043412 | macromolecule modification                                   |
| 2.88E-14 | GO:0019538 | protein metabolic process                                    |
| 1.74E-20 | GO:0036211 | protein modification process                                 |
| 1.17E-02 | GO:0032259 | methylation                                                  |
| 1.29E-10 | GO:0006807 | nitrogen compound metabolic process                          |
| 2.09E-10 | GO:0009058 | biosynthetic process                                         |
| 3.52E-11 | GO:1901576 | organic substance biosynthetic process                       |
| 1.00E-03 | GO:1901362 | organic cyclic compound biosynthetic process                 |
| 9.24E-09 | GO:0009059 | macromolecule biosynthetic process                           |
| 1.23E-04 | GO:0009056 | catabolic process                                            |
| 4.72E-04 | GO:1901575 | organic substance catabolic process                          |
| 2.81E-02 | GO:0009057 | macromolecule catabolic process                              |
| 3.31E-03 | GO:0030163 | protein catabolic process                                    |
| 2.39E-22 | GO:0044237 | cellular metabolic process                                   |
| 4.23E-08 | GO:0006793 | phosphorus metabolic process                                 |
| 2.22E-08 | GO:0006796 | phosphate-containing compound metabolic process              |
| 2.48E-03 | GO:0016310 | phosphorylation                                              |
| 4.14E-02 | GO:0019637 | organophosphate metabolic process                            |
| 8.69E-23 | GO:0044260 | cellular macromolecule metabolic process                     |
| 6.40E-03 | GO:0043414 | macromolecule methylation                                    |
| 1.06E-19 | GO:0044267 | cellular protein metabolic process                           |
| 1.74E-20 | GO:0006464 | cellular protein modification process                        |
| 5.04E-09 | GO:0070647 | protein modification by small protein conjugation or removal |
| 3.01E-07 | GO:0032446 | protein modification by small protein conjugation            |
| 4.23E-07 | GO:0016567 | protein ubiquitination                                       |
| 5.84E-09 | GO:0018193 | peptidyl-amino acid modification                             |
| 3.61E-04 | GO:0018196 | peptidyl-asparagine modification                             |
| 1.73E-04 | GO:0006468 | protein phosphorylation                                      |
| 4.82E-03 | GO:0044257 | cellular protein catabolic process                           |
| 1.22E-03 | GO:0051603 | proteolysis involved in cellular protein catabolic process   |

|          |            |                                                           |
|----------|------------|-----------------------------------------------------------|
| 2.76E-03 | GO:0010498 | proteasomal protein catabolic process                     |
| 4.27E-04 | GO:0019941 | modification-dependent protein catabolic process          |
| 2.61E-04 | GO:0006511 | ubiquitin-dependent protein catabolic process             |
| 4.04E-03 | GO:0043161 | proteasomal ubiquitin-dependent protein catabolic process |
| 2.15E-04 | GO:0044248 | cellular catabolic process                                |
| 1.65E-11 | GO:0046483 | heterocycle metabolic process                             |
| 3.13E-10 | GO:0006725 | cellular aromatic compound metabolic process              |
| 1.10E-10 | GO:0044249 | cellular biosynthetic process                             |
| 3.86E-04 | GO:0018130 | heterocycle biosynthetic process                          |
| 9.75E-04 | GO:0019438 | aromatic compound biosynthetic process                    |
| 6.13E-09 | GO:0034645 | cellular macromolecule biosynthetic process               |
| 2.60E-10 | GO:0034641 | cellular nitrogen compound metabolic process              |
| 2.84E-03 | GO:0044271 | cellular nitrogen compound biosynthetic process           |
| 1.34E-11 | GO:0006139 | nucleobase-containing compound metabolic process          |
| 6.14E-09 | GO:0090304 | nucleic acid metabolic process                            |
| 5.45E-08 | GO:0016070 | RNA metabolic process                                     |
| 7.89E-05 | GO:0006396 | RNA processing                                            |
| 7.60E-04 | GO:0034654 | nucleobase-containing compound biosynthetic process       |
| 4.30E-03 | GO:0032774 | RNA biosynthetic process                                  |
| 2.81E-04 | GO:0006351 | transcription, DNA-dependent                              |
| 4.27E-05 | GO:0006366 | transcription from RNA polymerase II promoter             |
| 1.42E-08 | GO:0051179 | localization                                              |
| 3.35E-10 | GO:0033036 | macromolecule localization                                |
| 9.34E-11 | GO:0008104 | protein localization                                      |
| 4.69E-10 | GO:0051641 | cellular localization                                     |
| 4.38E-04 | GO:0051640 | organelle localization                                    |
| 2.13E-07 | GO:0070727 | cellular macromolecule localization                       |
| 5.60E-07 | GO:0034613 | cellular protein localization                             |
| 3.46E-08 | GO:0071840 | cellular component organization or biogenesis             |
| 1.96E-07 | GO:0016043 | cellular component organization                           |
| 1.13E-04 | GO:0061024 | membrane organization                                     |
| 3.06E-04 | GO:0016044 | cellular membrane organization                            |
| 6.05E-12 | GO:0006996 | organelle organization                                    |
| 1.61E-04 | GO:0007010 | cytoskeleton organization                                 |
| 2.71E-02 | GO:0030036 | actin cytoskeleton organization                           |
| 3.73E-07 | GO:0051234 | establishment of localization                             |

|          |            |                                                           |
|----------|------------|-----------------------------------------------------------|
| 1.29E-06 | GO:0006810 | transport                                                 |
| 1.33E-03 | GO:0071702 | organic substance transport                               |
| 7.14E-13 | GO:0016192 | vesicle-mediated transport                                |
| 2.14E-04 | GO:0006897 | endocytosis                                               |
| 5.70E-08 | GO:0045184 | establishment of protein localization                     |
| 3.52E-08 | GO:0015031 | protein transport                                         |
| 2.24E-07 | GO:0051649 | establishment of localization in cell                     |
| 9.42E-10 | GO:0046907 | intracellular transport                                   |
| 2.07E-02 | GO:0051169 | nuclear transport                                         |
| 9.03E-06 | GO:0048193 | Golgi vesicle transport                                   |
| 3.28E-03 | GO:0006890 | retrograde vesicle-mediated transport, Golgi to ER        |
| 1.15E-05 | GO:0006886 | intracellular protein transport                           |
| 1.46E-11 | GO:0050789 | regulation of biological process                          |
| 5.76E-08 | GO:0048518 | positive regulation of biological process                 |
| 1.54E-02 | GO:0044087 | regulation of cellular component biogenesis               |
| 5.56E-07 | GO:0048519 | negative regulation of biological process                 |
| 1.40E-10 | GO:0019222 | regulation of metabolic process                           |
| 8.36E-06 | GO:0009889 | regulation of biosynthetic process                        |
| 2.99E-10 | GO:0080090 | regulation of primary metabolic process                   |
| 8.24E-11 | GO:0060255 | regulation of macromolecule metabolic process             |
| 1.29E-06 | GO:0010556 | regulation of macromolecule biosynthetic process          |
| 9.32E-07 | GO:0010468 | regulation of gene expression                             |
| 1.12E-02 | GO:0010608 | posttranscriptional regulation of gene expression         |
| 2.10E-06 | GO:0051246 | regulation of protein metabolic process                   |
| 1.52E-03 | GO:0009894 | regulation of catabolic process                           |
| 3.46E-09 | GO:0009893 | positive regulation of metabolic process                  |
| 8.49E-04 | GO:0009891 | positive regulation of biosynthetic process               |
| 1.18E-09 | GO:0010604 | positive regulation of macromolecule metabolic process    |
| 3.39E-04 | GO:0010628 | positive regulation of gene expression                    |
| 5.55E-06 | GO:0051247 | positive regulation of protein metabolic process          |
| 2.92E-04 | GO:0010557 | positive regulation of macromolecule biosynthetic process |
| 6.16E-04 | GO:0009892 | negative regulation of metabolic process                  |
| 1.84E-04 | GO:0010605 | negative regulation of macromolecule metabolic process    |
| 7.54E-04 | GO:0010629 | negative regulation of gene expression                    |
| 4.42E-02 | GO:0051248 | negative regulation of protein metabolic process          |
| 7.84E-03 | GO:0009890 | negative regulation of biosynthetic process               |

|          |            |                                                                         |
|----------|------------|-------------------------------------------------------------------------|
| 2.10E-03 | GO:0010558 | negative regulation of macromolecule biosynthetic process               |
| 3.41E-03 | GO:0050790 | regulation of catalytic activity                                        |
| 4.42E-03 | GO:0051338 | regulation of transferase activity                                      |
| 3.28E-02 | GO:0043085 | positive regulation of catalytic activity                               |
| 6.99E-03 | GO:0051347 | positive regulation of transferase activity                             |
| 4.83E-07 | GO:0051171 | regulation of nitrogen compound metabolic process                       |
| 1.85E-03 | GO:0051173 | positive regulation of nitrogen compound metabolic process              |
| 9.88E-03 | GO:0051172 | negative regulation of nitrogen compound metabolic process              |
| 4.51E-11 | GO:0050794 | regulation of cellular process                                          |
| 2.92E-08 | GO:0048522 | positive regulation of cellular process                                 |
| 1.53E-07 | GO:0048523 | negative regulation of cellular process                                 |
| 1.33E-03 | GO:0051726 | regulation of cell cycle                                                |
| 4.78E-04 | GO:0010646 | regulation of cell communication                                        |
| 3.20E-02 | GO:0010648 | negative regulation of cell communication                               |
| 3.83E-11 | GO:0031323 | regulation of cellular metabolic process                                |
| 4.38E-06 | GO:0031326 | regulation of cellular biosynthetic process                             |
| 3.51E-07 | GO:2000112 | regulation of cellular macromolecule biosynthetic process               |
| 7.82E-03 | GO:0031329 | regulation of cellular catabolic process                                |
| 1.71E-07 | GO:0019219 | regulation of nucleobase-containing compound metabolic process          |
| 1.61E-05 | GO:0051252 | regulation of RNA metabolic process                                     |
| 3.35E-05 | GO:2001141 | regulation of RNA biosynthetic process                                  |
| 1.46E-05 | GO:0006355 | regulation of transcription, DNA-dependent                              |
| 5.99E-04 | GO:0006357 | regulation of transcription from RNA polymerase II promoter             |
| 2.58E-02 | GO:0051174 | regulation of phosphorus metabolic process                              |
| 2.33E-02 | GO:0019220 | regulation of phosphate metabolic process                               |
| 3.99E-02 | GO:0042325 | regulation of phosphorylation                                           |
| 4.08E-03 | GO:0043549 | regulation of kinase activity                                           |
| 6.41E-03 | GO:0033674 | positive regulation of kinase activity                                  |
| 2.61E-09 | GO:0031325 | positive regulation of cellular metabolic process                       |
| 1.03E-03 | GO:0045935 | positive regulation of nucleobase-containing compound metabolic process |
| 3.29E-04 | GO:0051254 | positive regulation of RNA metabolic process                            |
| 3.07E-04 | GO:0031328 | positive regulation of cellular biosynthetic process                    |
| 4.59E-04 | GO:0045893 | positive regulation of transcription, DNA-dependent                     |
| 5.18E-04 | GO:0031324 | negative regulation of cellular metabolic process                       |
| 6.26E-03 | GO:0031327 | negative regulation of cellular biosynthetic process                    |
| 1.27E-03 | GO:2000113 | negative regulation of cellular macromolecule biosynthetic process      |

|          |            |                                                                         |
|----------|------------|-------------------------------------------------------------------------|
| 4.95E-03 | GO:0045934 | negative regulation of nucleobase-containing compound metabolic process |
| 2.33E-03 | GO:0051253 | negative regulation of RNA metabolic process                            |
| 1.36E-03 | GO:0045892 | negative regulation of transcription, DNA-dependent                     |
| 3.50E-02 | GO:0000122 | negative regulation of transcription from RNA polymerase II promoter    |
| 2.73E-08 | GO:0032268 | regulation of cellular protein metabolic process                        |
| 4.65E-07 | GO:0031399 | regulation of protein modification process                              |
| 3.37E-02 | GO:0031396 | regulation of protein ubiquitination                                    |
| 1.51E-02 | GO:0001932 | regulation of protein phosphorylation                                   |
| 6.17E-03 | GO:0045859 | regulation of protein kinase activity                                   |
| 9.04E-06 | GO:0032270 | positive regulation of cellular protein metabolic process               |
| 1.54E-04 | GO:0031401 | positive regulation of protein modification process                     |
| 6.30E-05 | GO:0051128 | regulation of cellular component organization                           |
| 3.30E-02 | GO:0051130 | positive regulation of cellular component organization                  |
| 3.31E-03 | GO:0033043 | regulation of organelle organization                                    |
| 3.75E-04 | GO:0023051 | regulation of signaling                                                 |
| 4.22E-02 | GO:0023057 | negative regulation of signaling                                        |
| 2.70E-02 | GO:0032989 | cellular component morphogenesis                                        |
| 2.92E-02 | GO:0032990 | cell part morphogenesis                                                 |
| 6.20E-03 | GO:0000902 | cell morphogenesis                                                      |
| 1.65E-05 | GO:0051716 | cellular response to stimulus                                           |
| 8.82E-03 | GO:0007165 | signal transduction                                                     |
| 5.96E-04 | GO:0035556 | intracellular signal transduction                                       |
| 4.11E-04 | GO:0007264 | small GTPase mediated signal transduction                               |
| 1.25E-05 | GO:0007265 | Ras protein signal transduction                                         |
| 1.75E-03 | GO:0007266 | Rho protein signal transduction                                         |
| 1.46E-04 | GO:0009966 | regulation of signal transduction                                       |
| 4.15E-02 | GO:0051056 | regulation of small GTPase mediated signal transduction                 |
| 1.56E-02 | GO:0046578 | regulation of Ras protein signal transduction                           |
| 2.00E-03 | GO:0035023 | regulation of Rho protein signal transduction                           |
| 3.46E-02 | GO:0009968 | negative regulation of signal transduction                              |
| 2.75E-05 | GO:0033554 | cellular response to stress                                             |
| 9.52E-03 | GO:0016568 | chromatin modification                                                  |
| 4.01E-04 | GO:0016569 | covalent chromatin modification                                         |
| 2.91E-04 | GO:0016570 | histone modification                                                    |
| 3.38E-02 | GO:0007015 | actin filament organization                                             |
| 2.21E-02 | GO:0048858 | cell projection morphogenesis                                           |

|          |            |                                                       |
|----------|------------|-------------------------------------------------------|
| 3.43E-02 | GO:0022604 | regulation of cell morphogenesis                      |
| 1.49E-02 | GO:0048667 | cell morphogenesis involved in neuron differentiation |
| 5.54E-03 | GO:0006487 | protein N-linked glycosylation                        |
| 1.22E-03 | GO:0018279 | protein N-linked glycosylation via asparagine         |
| 4.28E-03 | GO:0048812 | neuron projection morphogenesis                       |
| 4.83E-02 | GO:0007409 | axonogenesis                                          |
| 3.98E-02 | GO:0045860 | positive regulation of protein kinase activity        |
| 4.27E-03 | GO:0044419 | interspecies interaction between organisms            |
| 4.27E-03 | GO:0044403 | symbiosis, encompassing mutualism through parasitism  |
| 1.08E-03 | GO:0016032 | viral process                                         |
| 1.60E-02 | GO:0030032 | lamellipodium assembly                                |
| 2.17E-02 | GO:0071496 | cellular response to external stimulus                |
| 3.90E-02 | GO:0048770 | pigment granule                                       |
| 3.90E-02 | GO:0042470 | melanosome                                            |
| 1.86E-04 | GO:0070161 | anchoring junction                                    |
| 2.29E-04 | GO:0005912 | adherens junction                                     |
| 4.99E-02 | GO:0005913 | cell-cell adherens junction                           |
| 1.40E-03 | GO:0048475 | coated membrane                                       |
| 7.12E-12 | GO:0032991 | macromolecular complex                                |
| 1.54E-10 | GO:0043234 | protein complex                                       |
| 9.15E-34 | GO:0043226 | organelle                                             |
| 2.41E-09 | GO:0043228 | non-membrane-bounded organelle                        |
| 4.73E-03 | GO:0031982 | vesicle                                               |
| 3.33E-02 | GO:0031988 | membrane-bounded vesicle                              |
| 6.14E-34 | GO:0043227 | membrane-bounded organelle                            |
| 2.60E-16 | GO:0031974 | membrane-enclosed lumen                               |
| 3.24E-16 | GO:0005623 | cell                                                  |
| 3.10E-16 | GO:0044464 | cell part                                             |
| 3.37E-03 | GO:0031252 | cell leading edge                                     |
| 5.74E-50 | GO:0005622 | intracellular                                         |
| 2.13E-04 | GO:0012505 | endomembrane system                                   |
| 1.11E-48 | GO:0044424 | intracellular part                                    |
| 5.92E-38 | GO:0005737 | cytoplasm                                             |
| 3.60E-34 | GO:0043229 | intracellular organelle                               |
| 2.41E-09 | GO:0043232 | intracellular non-membrane-bounded organelle          |
| 3.50E-04 | GO:0005856 | cytoskeleton                                          |

|          |            |                                          |
|----------|------------|------------------------------------------|
| 1.85E-06 | GO:0015630 | microtubule cytoskeleton                 |
| 7.90E-34 | GO:0043231 | intracellular membrane-bounded organelle |
| 1.20E-22 | GO:0005634 | nucleus                                  |
| 1.55E-22 | GO:0044444 | cytoplasmic part                         |
| 1.96E-18 | GO:0005829 | cytosol                                  |
| 5.22E-03 | GO:0048471 | perinuclear region of cytoplasm          |
| 6.70E-05 | GO:0005938 | cell cortex                              |
| 1.81E-03 | GO:0044448 | cell cortex part                         |
| 5.03E-03 | GO:0030863 | cortical cytoskeleton                    |
| 3.33E-02 | GO:0031410 | cytoplasmic vesicle                      |
| 1.03E-04 | GO:0005768 | endosome                                 |
| 3.07E-09 | GO:0005794 | Golgi apparatus                          |
| 1.40E-03 | GO:0030117 | membrane coat                            |
| 6.74E-03 | GO:0030118 | clathrin coat                            |
| 1.95E-23 | GO:0044422 | organelle part                           |
| 6.03E-17 | GO:0043233 | organelle lumen                          |
| 5.14E-07 | GO:0031090 | organelle membrane                       |
| 1.66E-23 | GO:0044446 | intracellular organelle part             |
| 3.41E-18 | GO:0070013 | intracellular organelle lumen            |
| 1.55E-03 | GO:0044431 | Golgi apparatus part                     |
| 7.34E-04 | GO:0000139 | Golgi membrane                           |
| 1.93E-18 | GO:0044428 | nuclear part                             |
| 5.86E-18 | GO:0031981 | nuclear lumen                            |
| 8.70E-15 | GO:0005654 | nucleoplasm                              |
| 1.44E-06 | GO:0044451 | nucleoplasm part                         |
| 5.63E-04 | GO:0005730 | nucleolus                                |
| 2.26E-03 | GO:0044430 | cytoskeletal part                        |
| 2.67E-02 | GO:0005815 | microtubule organizing center            |
| 2.12E-03 | GO:0005819 | spindle                                  |
| 4.47E-02 | GO:0030027 | lamellipodium                            |
| 7.59E-04 | GO:0003674 | molecular_function                       |
| 1.40E-31 | GO:0005488 | binding                                  |
| 7.19E-05 | GO:1901363 | heterocyclic compound binding            |
| 7.78E-38 | GO:0005515 | protein binding                          |
| 2.27E-04 | GO:0008092 | cytoskeletal protein binding             |
| 8.36E-08 | GO:0019899 | enzyme binding                           |



|          |            |                                                                 |
|----------|------------|-----------------------------------------------------------------|
| 2.55E-03 | GO:0019900 | kinase binding                                                  |
| 7.74E-04 | GO:0019901 | protein kinase binding                                          |
| 8.51E-06 | GO:0008134 | transcription factor binding                                    |
| 1.22E-02 | GO:0051219 | phosphoprotein binding                                          |
| 1.46E-03 | GO:0045309 | protein phosphorylated amino acid binding                       |
| 1.16E-03 | GO:0019904 | protein domain specific binding                                 |
| 1.01E-04 | GO:0097159 | organic cyclic compound binding                                 |
| 7.87E-11 | GO:1901265 | nucleoside phosphate binding                                    |
| 1.23E-06 | GO:0043167 | ion binding                                                     |
| 1.44E-12 | GO:0043168 | anion binding                                                   |
| 9.91E-07 | GO:0035639 | purine ribonucleoside triphosphate binding                      |
| 1.11E-10 | GO:0036094 | small molecule binding                                          |
| 1.69E-06 | GO:0001882 | nucleoside binding                                              |
| 1.77E-06 | GO:0032549 | ribonucleoside binding                                          |
| 1.70E-06 | GO:0001883 | purine nucleoside binding                                       |
| 1.48E-06 | GO:0032550 | purine ribonucleoside binding                                   |
| 7.49E-11 | GO:0000166 | nucleotide binding                                              |
| 6.48E-06 | GO:0032553 | ribonucleotide binding                                          |
| 2.71E-06 | GO:0017076 | purine nucleotide binding                                       |
| 3.26E-06 | GO:0032555 | purine ribonucleotide binding                                   |
| 3.56E-07 | GO:0030554 | adenyl nucleotide binding                                       |
| 4.72E-07 | GO:0032559 | adenyl ribonucleotide binding                                   |
| 1.58E-07 | GO:0005524 | ATP binding                                                     |
| 2.08E-02 | GO:0003682 | chromatin binding                                               |
| 1.30E-05 | GO:0008289 | lipid binding                                                   |
| 1.68E-06 | GO:0005543 | phospholipid binding                                            |
| 1.07E-03 | GO:0035091 | phosphatidylinositol binding                                    |
| 3.31E-09 | GO:0003824 | catalytic activity                                              |
| 8.95E-03 | GO:0016874 | ligase activity                                                 |
| 1.44E-06 | GO:0016740 | transferase activity                                            |
| 1.00E-05 | GO:0016772 | transferase activity, transferring phosphorus-containing groups |
| 2.58E-04 | GO:0016301 | kinase activity                                                 |
| 2.86E-05 | GO:0016773 | phosphotransferase activity, alcohol group as acceptor          |
| 2.00E-02 | GO:0004672 | protein kinase activity                                         |
| 2.31E-07 | GO:0000988 | protein binding transcription factor activity                   |
| 2.11E-07 | GO:0000989 | transcription factor binding transcription factor activity      |

|          |                |                                                                      |
|----------|----------------|----------------------------------------------------------------------|
| 1.48E-05 | GO:0003712     | transcription cofactor activity                                      |
| 6.13E-04 | GO:0003713     | transcription coactivator activity                                   |
| 2.16E-02 | GO:0030374     | ligand-dependent nuclear receptor transcription coactivator activity |
| 2.66E-03 | GO:0008565     | protein transporter activity                                         |
| 3.25E-02 | GO:0003723     | RNA binding                                                          |
| 6.45E-45 | BIOGRID:000000 | BioGRID interaction data                                             |
| 1.16E-02 | CORUM:1413     | NCOR1 complex                                                        |
| 2.11E-02 | HP:0000759     | Abnormality of the peripheral nervous system                         |
| 3.68E-02 | KEGG:04530     | Tight junction                                                       |
| 4.36E-03 | KEGG:05212     | Pancreatic cancer                                                    |
| 1.31E-02 | KEGG:05211     | Renal cell carcinoma                                                 |
| 4.37E-03 | KEGG:04360     | Axon guidance                                                        |
| 2.62E-02 | KEGG:05131     | Shigellosis                                                          |
| 1.28E-03 | KEGG:05220     | Chronic myeloid leukemia                                             |
| 1.38E-02 | KEGG:04722     | Neurotrophin signaling pathway                                       |
| 2.47E-02 | KEGG:04330     | Notch signaling pathway                                              |
| 3.09E-02 | KEGG:05219     | Bladder cancer                                                       |
| 2.82E-02 | KEGG:04810     | Regulation of actin cytoskeleton                                     |
| 9.74E-03 | KEGG:04912     | GnRH signaling pathway                                               |
| 3.77E-04 | KEGG:04520     | Adherens junction                                                    |
| 2.76E-03 | MI:hsa-miR-497 | MI:hsa-miR-497                                                       |
| 3.12E-02 | MI:mmu-miR-34  | MI:mmu-miR-341                                                       |
| 3.46E-03 | MI:mmu-miR-67  | MI:mmu-miR-673-5p                                                    |
| 4.17E-02 | MI:hsa-miR-197 | MI:hsa-miR-197                                                       |
| 1.27E-02 | MI:mmu-miR-54  | MI:mmu-miR-540-5p                                                    |
| 2.20E-03 | MI:rno-miR-347 | MI:rno-miR-347                                                       |
| 4.30E-02 | MI:mmu-miR-71  | MI:mmu-miR-715                                                       |
| 3.78E-02 | MI:hsa-miR-449 | MI:hsa-miR-449b                                                      |
| 3.91E-03 | MI:mmu-miR-68  | MI:mmu-miR-689                                                       |
| 2.73E-03 | MI:hsa-miR-524 | MI:hsa-miR-524-3p                                                    |
| 4.72E-05 | MI:hsa-miR-874 | MI:hsa-miR-874                                                       |
| 4.99E-02 | MI:hsa-miR-933 | MI:hsa-miR-933                                                       |
| 1.55E-02 | MI:hsa-miR-615 | MI:hsa-miR-615-3p                                                    |
| 1.77E-02 | MI:hsa-miR-490 | MI:hsa-miR-490-3p                                                    |
| 3.18E-02 | MI:mmu-miR-35  | MI:mmu-miR-351                                                       |
| 5.00E-02 | MI:mmu-miR-76  | MI:mmu-miR-762                                                       |

|          |                |                                          |
|----------|----------------|------------------------------------------|
| 5.59E-04 | MI:mmu-miR-70  | MI:mmu-miR-702                           |
| 2.62E-03 | MI:hsa-miR-503 | MI:hsa-miR-503                           |
| 2.68E-02 | MI:hsa-miR-574 | MI:hsa-miR-574-3p                        |
| 2.89E-03 | MI:hsa-miR-214 | MI:hsa-miR-214                           |
| 2.86E-02 | MI:hsa-miR-24  | MI:hsa-miR-24                            |
| 1.90E-02 | MI:hsa-miR-195 | MI:hsa-miR-195                           |
| 8.04E-05 | MI:hsa-miR-92b | MI:hsa-miR-92b*                          |
| 1.87E-03 | MI:hsa-miR-324 | MI:hsa-miR-324-5p                        |
| 3.68E-03 | MI:mmu-miR-71  | MI:mmu-miR-714                           |
| 7.86E-07 | MI:hsa-miR-324 | MI:hsa-miR-324-3p                        |
| 3.99E-04 | MI:hsa-miR-608 | MI:hsa-miR-608                           |
| 1.08E-03 | MI:hsa-miR-15b | MI:hsa-miR-15b                           |
| 1.82E-03 | MI:hsa-miR-412 | MI:hsa-miR-412                           |
| 1.87E-03 | MI:hsa-miR-483 | MI:hsa-miR-483-5p                        |
| 2.83E-03 | MI:hsa-miR-744 | MI:hsa-miR-744                           |
| 1.32E-04 | MI:hsa-miR-423 | MI:hsa-miR-423-5p                        |
| 4.13E-05 | MI:hsa-miR-296 | MI:hsa-miR-296-5p                        |
| 5.81E-04 | MI:hsa-miR-486 | MI:hsa-miR-486-3p                        |
| 1.03E-05 | MI:hsa-miR-885 | MI:hsa-miR-885-3p                        |
| 1.26E-04 | MI:hsa-miR-615 | MI:hsa-miR-615-5p                        |
| 2.45E-02 | MI:hsa-miR-887 | MI:hsa-miR-887                           |
| 1.65E-03 | MI:hsa-miR-525 | MI:hsa-miR-525-3p                        |
| 2.64E-04 | MI:mmu-miR-70  | MI:mmu-miR-705                           |
| 1.98E-02 | MI:mmu-miR-67  | MI:mmu-miR-673-3p                        |
| 3.15E-02 | MI:hsa-miR-642 | MI:hsa-miR-642                           |
| 1.06E-02 | MI:hsa-miR-602 | MI:hsa-miR-602                           |
| 1.20E-02 | REAC:186763    | Down-stream signal transduction          |
| 1.55E-02 | REAC:112412    | SOS-mediated signalling                  |
| 2.87E-02 | REAC:77388     | SHC-related events                       |
| 7.76E-03 | REAC:112410    | SHC-mediated signalling                  |
| 8.51E-03 | REAC:177929    | Signaling by EGFR                        |
| 1.55E-02 | REAC:179812    | Grb2 events in EGFR signaling            |
| 2.87E-02 | REAC:180336    | Shc events in EGFR signaling             |
| 4.67E-06 | REAC:166520    | Signalling by NGF                        |
| 4.30E-02 | REAC:187037    | TRKA signalling from the plasma membrane |
| 3.52E-02 | REAC:187687    | Signalling to ERKs                       |

|                      |                                                                                  |
|----------------------|----------------------------------------------------------------------------------|
| 1.98E-02 REAC:167044 | Signalling to RAS                                                                |
| 1.11E-02 REAC:109869 | MAP kinase cascade                                                               |
| 3.96E-02 REAC:375432 | Vamp2 associated Clathrin derived vesicle budding                                |
| 2.08E-02 REAC:72203  | Processing of Capped Intron-Containing Pre-mRNA                                  |
| 1.98E-02 REAC:379716 | Cytosolic tRNA aminoacylation                                                    |
| 4.77E-02 REAC:72130  | Formation of an intermediate Spliceosomal C complex                              |
| 3.30E-02 REAC:112295 | Elongation and Processing of Capped Transcripts                                  |
| 3.30E-02 REAC:76043  | Elongation of Intron-Containing Transcripts and co-transcriptional mRNA splicing |
| 3.96E-02 REAC:375434 | Vamp8 associated clathrin derived vesicle budding                                |
| 7.68E-03 TF:M00178_4 | Factor: CREB; motif: NSTGACGTMANN; match class: 4                                |
| 1.48E-02 TF:M00179_4 | Factor: ATF2; motif: VGTGACGTMACN; match class: 4                                |
| 5.29E-03 TF:M00981_2 | Factor: CREB, ATF; motif: NTGACGTNA; match class: 2                              |
| 1.96E-02 TF:M00981_0 | Factor: CREB, ATF; motif: NTGACGTNA; match class: 0                              |
| 1.83E-02 TF:M00965_4 | Factor: LXR, PXR, CAR, COUP, RAR; motif: YGAMCTNNASTRACCYN; match class: 4       |
| 9.33E-21 TF:M00915_4 | Factor: AP-2; motif: SNNNCCNCAGGCN; match class: 4                               |
| 6.00E-15 TF:M00915_3 | Factor: AP-2; motif: SNNNCCNCAGGCN; match class: 3                               |
| 5.51E-11 TF:M00915_2 | Factor: AP-2; motif: SNNNCCNCAGGCN; match class: 2                               |
| 4.35E-02 TF:M00915_1 | Factor: AP-2; motif: SNNNCCNCAGGCN; match class: 1                               |
| 1.64E-30 TF:M00931_4 | Factor: Sp1; motif: GGGGCGGGGC; match class: 4                                   |
| 4.82E-32 TF:M00931_3 | Factor: Sp1; motif: GGGGCGGGGC; match class: 3                                   |
| 3.20E-29 TF:M00931_2 | Factor: Sp1; motif: GGGGCGGGGC; match class: 2                                   |
| 6.47E-22 TF:M00931_1 | Factor: Sp1; motif: GGGGCGGGGC; match class: 1                                   |
| 2.00E-20 TF:M00931_0 | Factor: Sp1; motif: GGGGCGGGGC; match class: 0                                   |
| 2.13E-02 TF:M00982_4 | Factor: KROX; motif: CCCGCCCCRCRCCC; match class: 4                              |
| 7.56E-03 TF:M00982_3 | Factor: KROX; motif: CCCGCCCCRCRCCC; match class: 3                              |
| 2.79E-02 TF:M00982_2 | Factor: KROX; motif: CCCGCCCCRCRCCC; match class: 2                              |
| 8.34E-07 TF:M00431_4 | Factor: E2F-1; motif: TTTSGCGS; match class: 4                                   |
| 1.25E-06 TF:M00431_3 | Factor: E2F-1; motif: TTTSGCGS; match class: 3                                   |
| 2.24E-29 TF:M00932_4 | Factor: Sp1; motif: NNGGGGCGGGGNN; match class: 4                                |
| 1.63E-30 TF:M00932_3 | Factor: Sp1; motif: NNGGGGCGGGGNN; match class: 3                                |
| 7.10E-30 TF:M00932_2 | Factor: Sp1; motif: NNGGGGCGGGGNN; match class: 2                                |
| 4.73E-20 TF:M00932_1 | Factor: Sp1; motif: NNGGGGCGGGGNN; match class: 1                                |
| 5.34E-09 TF:M00932_0 | Factor: Sp1; motif: NNGGGGCGGGGNN; match class: 0                                |
| 4.73E-04 TF:M00444_4 | Factor: VDR; motif: GGGKNARNRRGGWSA; match class: 4                              |
| 1.27E-03 TF:M00444_3 | Factor: VDR; motif: GGGKNARNRRGGWSA; match class: 3                              |
| 6.77E-31 TF:M00196_4 | Factor: Sp1; motif: NGGGGCGGGGYN; match class: 4                                 |

|                      |                                                       |
|----------------------|-------------------------------------------------------|
| 1.10E-29 TF:M00196_3 | Factor: Sp1; motif: NGGGGGCGGGGYN; match class: 3     |
| 2.53E-26 TF:M00196_2 | Factor: Sp1; motif: NGGGGGCGGGGYN; match class: 2     |
| 2.27E-17 TF:M00196_1 | Factor: Sp1; motif: NGGGGGCGGGGYN; match class: 1     |
| 1.44E-08 TF:M00196_0 | Factor: Sp1; motif: NGGGGGCGGGGYN; match class: 0     |
| 7.73E-04 TF:M00469_4 | Factor: AP-2alpha; motif: GCCNNNRGS; match class: 4   |
| 7.73E-04 TF:M00469_0 | Factor: AP-2alpha; motif: GCCNNNRGS; match class: 0   |
| 4.14E-22 TF:M00933_4 | Factor: Sp1; motif: CCCC GCCCCN; match class: 4       |
| 7.91E-22 TF:M00933_3 | Factor: Sp1; motif: CCCC GCCCCN; match class: 3       |
| 2.40E-21 TF:M00933_2 | Factor: Sp1; motif: CCCC GCCCCN; match class: 2       |
| 1.30E-20 TF:M00933_1 | Factor: Sp1; motif: CCCC GCCCCN; match class: 1       |
| 2.94E-08 TF:M00933_0 | Factor: Sp1; motif: CCCC GCCCCN; match class: 0       |
| 1.52E-04 TF:M01035_0 | Factor: YY1; motif: NYNKCCATNTT; match class: 0       |
| 1.01E-33 TF:M00008_4 | Factor: Sp1; motif: GGGGCGGGGT; match class: 4        |
| 6.38E-33 TF:M00008_3 | Factor: Sp1; motif: GGGGCGGGGT; match class: 3        |
| 4.63E-21 TF:M00008_2 | Factor: Sp1; motif: GGGGCGGGGT; match class: 2        |
| 2.89E-02 TF:M00940_4 | Factor: E2F-1; motif: NTTTCGCGCS; match class: 4      |
| 9.72E-14 TF:M00189_4 | Factor: AP-2; motif: MKCCCSCNGGCG; match class: 4     |
| 1.33E-11 TF:M00189_3 | Factor: AP-2; motif: MKCCCSCNGGCG; match class: 3     |
| 3.35E-03 TF:M00189_2 | Factor: AP-2; motif: MKCCCSCNGGCG; match class: 2     |
| 2.38E-15 TF:M00695_0 | Factor: ETF; motif: GVGGMGG; match class: 0           |
| 1.07E-16 TF:M00025_4 | Factor: Elk-1; motif: NNNNCCGGAARTNN; match class: 4  |
| 2.72E-14 TF:M00025_3 | Factor: Elk-1; motif: NNNNCCGGAARTNN; match class: 3  |
| 1.39E-09 TF:M00025_2 | Factor: Elk-1; motif: NNNNCCGGAARTNN; match class: 2  |
| 2.26E-05 TF:M00025_1 | Factor: Elk-1; motif: NNNNCCGGAARTNN; match class: 1  |
| 8.26E-03 TF:M00470_4 | Factor: AP-2gamma; motif: GCCYNNNGGS; match class: 4  |
| 8.26E-03 TF:M00470_2 | Factor: AP-2gamma; motif: GCCYNNNGGS; match class: 2  |
| 1.21E-04 TF:M01072_4 | Factor: HIC1; motif: NSNNNTGCCSSNN; match class: 4    |
| 7.66E-03 TF:M01072_3 | Factor: HIC1; motif: NSNNNTGCCSSNN; match class: 3    |
| 4.88E-16 TF:M00800_4 | Factor: AP-2; motif: GSCCSCRGGCNRNRNN; match class: 4 |
| 9.31E-11 TF:M00800_3 | Factor: AP-2; motif: GSCCSCRGGCNRNRNN; match class: 3 |
| 5.62E-07 TF:M00800_2 | Factor: AP-2; motif: GSCCSCRGGCNRNRNN; match class: 2 |
| 8.32E-41 TF:M00803_0 | Factor: E2F; motif: GGCGSG; match class: 0            |
| 5.28E-03 TF:M00427_4 | Factor: E2F; motif: TTTS GCGS; match class: 4         |
| 1.06E-04 TF:M01035_2 | Factor: YY1; motif: NYNKCCATNTT; match class: 2       |
| 3.87E-12 TF:M01100_4 | Factor: LRF; motif: VNNRMCCCC; match class: 4         |
| 1.35E-15 TF:M01100_3 | Factor: LRF; motif: VNNRMCCCC; match class: 3         |

|          |             |                                                |
|----------|-------------|------------------------------------------------|
| 2.14E-14 | TF:M01100_2 | Factor: LRF; motif: VNNRMCCCC; match class: 2  |
| 1.59E-05 | TF:M01100_1 | Factor: LRF; motif: VNNRMCCCC; match class: 1  |
| 1.50E-21 | TF:M00428_4 | Factor: E2F-1; motif: NKTSSCGC; match class: 4 |
| 2.89E-19 | TF:M00428_3 | Factor: E2F-1; motif: NKTSSCGC; match class: 3 |
| 3.09E-08 | TF:M00428_2 | Factor: E2F-1; motif: NKTSSCGC; match class: 2 |
| 6.25E-03 | TF:M00428_1 | Factor: E2F-1; motif: NKTSSCGC; match class: 1 |

### Functional Enrichment Results, Fig 5 Purple Cluster

| p-value  | term ID    | term name                                            |
|----------|------------|------------------------------------------------------|
| 4.24E-03 | GO:0006793 | phosphorus metabolic process                         |
| 8.51E-03 | GO:0006796 | phosphate-containing compound metabolic process      |
| 1.06E-02 | GO:0016310 | phosphorylation                                      |
| 6.30E-04 | GO:0001816 | cytokine production                                  |
| 2.47E-02 | GO:0001817 | regulation of cytokine production                    |
| 4.45E-02 | GO:0043551 | regulation of phosphatidylinositol 3-kinase activity |
| 1.03E-02 | GO:0071887 | leukocyte apoptotic process                          |
| 3.22E-03 | GO:0050817 | coagulation                                          |
| 3.61E-06 | GO:0008150 | biological_process                                   |
| 1.94E-11 | GO:0050896 | response to stimulus                                 |
| 1.26E-02 | GO:0042221 | response to chemical stimulus                        |
| 3.16E-05 | GO:0010033 | response to organic substance                        |
| 1.02E-09 | GO:0006950 | response to stress                                   |
| 4.21E-07 | GO:0006952 | defense response                                     |
| 3.23E-12 | GO:0009611 | response to wounding                                 |
| 1.22E-04 | GO:0042060 | wound healing                                        |
| 2.96E-05 | GO:0006954 | inflammatory response                                |
| 2.27E-06 | GO:0009607 | response to biotic stimulus                          |
| 2.56E-07 | GO:0051707 | response to other organism                           |
| 2.00E-03 | GO:0009615 | response to virus                                    |
| 2.13E-02 | GO:0002237 | response to molecule of bacterial origin             |
| 3.35E-04 | GO:0040011 | locomotion                                           |
| 1.83E-12 | GO:0044699 | single-organism process                              |
| 1.22E-07 | GO:0016265 | death                                                |
| 8.10E-09 | GO:0065007 | biological regulation                                |
| 4.97E-04 | GO:0065008 | regulation of biological quality                     |
| 2.66E-02 | GO:0050878 | regulation of body fluid levels                      |
| 3.56E-03 | GO:0007599 | hemostasis                                           |
| 2.61E-03 | GO:0007596 | blood coagulation                                    |
| 1.00E-07 | GO:0065009 | regulation of molecular function                     |
| 5.12E-09 | GO:0044093 | positive regulation of molecular function            |
| 8.39E-07 | GO:0009987 | cellular process                                     |
| 1.50E-10 | GO:0044763 | single-organism cellular process                     |
| 5.09E-03 | GO:0006928 | cellular component movement                          |
| 4.15E-07 | GO:0007154 | cell communication                                   |

|          |            |                                             |
|----------|------------|---------------------------------------------|
| 6.81E-10 | GO:0001775 | cell activation                             |
| 4.14E-08 | GO:0051716 | cellular response to stimulus               |
| 1.09E-07 | GO:0008219 | cell death                                  |
| 5.79E-08 | GO:0012501 | programmed cell death                       |
| 1.30E-07 | GO:0006915 | apoptotic process                           |
| 2.08E-02 | GO:0032502 | developmental process                       |
| 5.98E-06 | GO:0051179 | localization                                |
| 8.86E-05 | GO:0051674 | localization of cell                        |
| 8.86E-05 | GO:0048870 | cell motility                               |
| 1.23E-05 | GO:0016477 | cell migration                              |
| 1.12E-16 | GO:0002376 | immune system process                       |
| 5.39E-05 | GO:0002252 | immune effector process                     |
| 2.40E-11 | GO:0006955 | immune response                             |
| 3.22E-02 | GO:0002250 | adaptive immune response                    |
| 3.49E-02 | GO:0045087 | innate immune response                      |
| 1.37E-07 | GO:0045321 | leukocyte activation                        |
| 3.29E-02 | GO:0002274 | myeloid leukocyte activation                |
| 4.53E-07 | GO:0046649 | lymphocyte activation                       |
| 3.06E-08 | GO:0042110 | T cell activation                           |
| 7.33E-06 | GO:0050900 | leukocyte migration                         |
| 5.10E-07 | GO:0022610 | biological adhesion                         |
| 1.04E-06 | GO:0007155 | cell adhesion                               |
| 7.26E-07 | GO:0023052 | signaling                                   |
| 7.26E-07 | GO:0044700 | single organism signaling                   |
| 2.37E-07 | GO:0050789 | regulation of biological process            |
| 3.43E-10 | GO:0048518 | positive regulation of biological process   |
| 1.94E-09 | GO:0048583 | regulation of response to stimulus          |
| 1.76E-05 | GO:0048584 | positive regulation of response to stimulus |
| 1.04E-02 | GO:0080134 | regulation of response to stress            |
| 2.47E-02 | GO:0048519 | negative regulation of biological process   |
| 4.90E-05 | GO:0050794 | regulation of cellular process              |
| 1.47E-06 | GO:0048522 | positive regulation of cellular process     |
| 3.01E-04 | GO:0010646 | regulation of cell communication            |
| 3.77E-02 | GO:0010647 | positive regulation of cell communication   |
| 9.10E-06 | GO:0050865 | regulation of cell activation               |
| 1.55E-05 | GO:0050867 | positive regulation of cell activation      |



|          |            |                                                  |
|----------|------------|--------------------------------------------------|
| 1.97E-06 | GO:0010941 | regulation of cell death                         |
| 7.06E-07 | GO:0043067 | regulation of programmed cell death              |
| 8.85E-07 | GO:0042981 | regulation of apoptotic process                  |
| 2.50E-02 | GO:2000106 | regulation of leukocyte apoptotic process        |
| 5.47E-08 | GO:0007165 | signal transduction                              |
| 9.11E-08 | GO:0035556 | intracellular signal transduction                |
| 4.60E-02 | GO:0097190 | apoptotic signaling pathway                      |
| 2.98E-07 | GO:0002682 | regulation of immune system process              |
| 7.54E-05 | GO:0002694 | regulation of leukocyte activation               |
| 6.43E-05 | GO:0051249 | regulation of lymphocyte activation              |
| 6.10E-05 | GO:0050863 | regulation of T cell activation                  |
| 6.19E-08 | GO:0002684 | positive regulation of immune system process     |
| 6.62E-05 | GO:0002696 | positive regulation of leukocyte activation      |
| 4.08E-04 | GO:0051251 | positive regulation of lymphocyte activation     |
| 1.61E-03 | GO:0050870 | positive regulation of T cell activation         |
| 1.39E-05 | GO:0050776 | regulation of immune response                    |
| 9.35E-05 | GO:0050778 | positive regulation of immune response           |
| 5.20E-05 | GO:0002253 | activation of immune response                    |
| 2.51E-04 | GO:0023051 | regulation of signaling                          |
| 3.53E-02 | GO:0023056 | positive regulation of signaling                 |
| 6.92E-05 | GO:0009966 | regulation of signal transduction                |
| 2.34E-02 | GO:0009967 | positive regulation of signal transduction       |
| 1.08E-05 | GO:0050790 | regulation of catalytic activity                 |
| 7.58E-03 | GO:0051336 | regulation of hydrolase activity                 |
| 9.95E-07 | GO:0043085 | positive regulation of catalytic activity        |
| 6.74E-05 | GO:0051345 | positive regulation of hydrolase activity        |
| 1.87E-02 | GO:0048513 | organ development                                |
| 1.76E-04 | GO:0002520 | immune system development                        |
| 1.41E-04 | GO:0048534 | hematopoietic or lymphoid organ development      |
| 7.18E-04 | GO:0030097 | hemopoiesis                                      |
| 2.59E-04 | GO:0002521 | leukocyte differentiation                        |
| 2.24E-02 | GO:1902107 | positive regulation of leukocyte differentiation |
| 1.55E-05 | GO:0030098 | lymphocyte differentiation                       |
| 2.61E-06 | GO:0030217 | T cell differentiation                           |
| 2.47E-02 | GO:0051270 | regulation of cellular component movement        |
| 1.40E-02 | GO:2000145 | regulation of cell motility                      |

|          |               |                                                   |
|----------|---------------|---------------------------------------------------|
| 9.60E-03 | GO:0030334    | regulation of cell migration                      |
| 1.18E-02 | GO:0060326    | cell chemotaxis                                   |
| 3.29E-02 | GO:0030595    | leukocyte chemotaxis                              |
| 4.54E-02 | GO:0071621    | granulocyte chemotaxis                            |
| 5.64E-03 | GO:0045619    | regulation of lymphocyte differentiation          |
| 3.12E-03 | GO:0045580    | regulation of T cell differentiation              |
| 1.55E-03 | GO:0045621    | positive regulation of lymphocyte differentiation |
| 3.35E-02 | GO:0045582    | positive regulation of T cell differentiation     |
| 3.12E-02 | GO:0005623    | cell                                              |
| 3.07E-02 | GO:0044464    | cell part                                         |
| 1.89E-03 | GO:0005622    | intracellular                                     |
| 1.34E-03 | GO:0044424    | intracellular part                                |
| 3.45E-13 | GO:0005737    | cytoplasm                                         |
| 1.62E-07 | GO:0044444    | cytoplasmic part                                  |
| 2.50E-03 | GO:0005829    | cytosol                                           |
| 1.81E-03 | GO:0044459    | plasma membrane part                              |
| 7.53E-03 | GO:0015629    | actin cytoskeleton                                |
| 7.63E-03 | GO:0030055    | cell-substrate junction                           |
| 4.77E-02 | GO:0005912    | adherens junction                                 |
| 1.36E-02 | GO:0005924    | cell-substrate adherens junction                  |
| 2.97E-02 | GO:0005925    | focal adhesion                                    |
| 2.02E-02 | GO:0005887    | integral to plasma membrane                       |
| 5.44E-06 | GO:0005488    | binding                                           |
| 3.25E-10 | GO:0005515    | protein binding                                   |
| 5.99E-03 | GO:0004896    | cytokine receptor activity                        |
| 2.11E-16 | BIOGRID:00000 | BioGRID interaction data                          |
| 4.98E-02 | CORUM:575     | ABIN2-NFKB1-MAP3K8 complex                        |
| 1.16E-02 | KEGG:05162    | Measles                                           |
| 7.07E-03 | KEGG:04060    | Cytokine-cytokine receptor interaction            |
| 1.78E-02 | KEGG:04062    | Chemokine signaling pathway                       |
| 3.88E-02 | KEGG:04064    | NF-kappa B signaling pathway                      |
| 6.36E-04 | KEGG:04668    | TNF signaling pathway                             |
| 1.08E-02 | KEGG:04621    | NOD-like receptor signaling pathway               |
| 2.14E-03 | KEGG:05202    | Transcriptional misregulation in cancer           |
| 7.23E-03 | KEGG:04660    | T cell receptor signaling pathway                 |
| 3.22E-02 | KEGG:05142    | Chagas disease (American trypanosomiasis)         |

|                      |                                                            |
|----------------------|------------------------------------------------------------|
| 1.71E-03 REAC:109582 | Hemostasis                                                 |
| 1.07E-02 REAC:202733 | Cell surface interactions at the vascular wall             |
| 3.71E-02 REAC:182594 | Association of INK4A with Cdk4/6                           |
| 2.28E-03 REAC:380108 | Chemokine receptors bind chemokines                        |
| 1.51E-03 TF:M00052_4 | Factor: NF-kappaB (p65); motif: GGGRATTTC; match class: 4  |
| 9.41E-03 TF:M00054_3 | Factor: NF-kappaB; motif: GGGAMTTYCC; match class: 3       |
| 6.69E-03 TF:M00054_2 | Factor: NF-kappaB; motif: GGGAMTTYCC; match class: 2       |
| 4.66E-02 TF:M00194_4 | Factor: NF-kappaB; motif: NGGGGAMTTTCCNN; match class: 4   |
| 3.25E-03 TF:M00774_1 | Factor: NF-kappaB; motif: NNNNKGGRAANTCCCN; match class: 1 |
| 8.70E-03 TF:M00774_0 | Factor: NF-kappaB; motif: NNNNKGGRAANTCCCN; match class: 0 |

### Functional Enrichment Results, Fig 5 Brown Cluster

| p-value  | term ID        | term name                                               |
|----------|----------------|---------------------------------------------------------|
| 1.79E-03 | GO:0007154     | cell communication                                      |
| 4.69E-02 | GO:0008150     | biological_process                                      |
| 3.11E-03 | GO:0065007     | biological regulation                                   |
| 3.06E-03 | GO:0032502     | developmental process                                   |
| 1.01E-03 | GO:0048856     | anatomical structure development                        |
| 1.40E-02 | GO:0050789     | regulation of biological process                        |
| 1.07E-02 | GO:0050794     | regulation of cellular process                          |
| 1.58E-02 | GO:0007275     | multicellular organismal development                    |
| 4.10E-02 | GO:0048102     | autophagic cell death                                   |
| 2.03E-03 | GO:0005911     | cell-cell junction                                      |
| 9.58E-03 | GO:0030057     | desmosome                                               |
| 6.26E-03 | GO:0001533     | cornified envelope                                      |
| 2.67E-03 | GO:0005622     | intracellular                                           |
| 5.31E-03 | GO:0044424     | intracellular part                                      |
| 1.45E-07 | GO:0005737     | cytoplasm                                               |
| 2.20E-02 | GO:0005515     | protein binding                                         |
| 1.70E-02 | GO:0008289     | lipid binding                                           |
| 4.23E-02 | MI:hsa-miR-214 | MI:hsa-miR-214                                          |
| 5.51E-05 | TF:M00931_4    | Factor: Sp1; motif: GGGGCGGGGC; match class: 4          |
| 4.73E-05 | TF:M00931_3    | Factor: Sp1; motif: GGGGCGGGGC; match class: 3          |
| 8.77E-04 | TF:M00931_2    | Factor: Sp1; motif: GGGGCGGGGC; match class: 2          |
| 5.28E-03 | TF:M00931_1    | Factor: Sp1; motif: GGGGCGGGGC; match class: 1          |
| 7.23E-03 | TF:M00931_0    | Factor: Sp1; motif: GGGGCGGGGC; match class: 0          |
| 1.67E-06 | TF:M00932_4    | Factor: Sp1; motif: NNGGGGCGGGGNN; match class: 4       |
| 1.27E-04 | TF:M00932_3    | Factor: Sp1; motif: NNGGGGCGGGGNN; match class: 3       |
| 1.75E-03 | TF:M00932_2    | Factor: Sp1; motif: NNGGGGCGGGGNN; match class: 2       |
| 1.07E-04 | TF:M00932_1    | Factor: Sp1; motif: NNGGGGCGGGGNN; match class: 1       |
| 4.70E-02 | TF:M00982_4    | Factor: KROX; motif: CCCGCCCCRCCCC; match class: 4      |
| 2.54E-02 | TF:M00469_4    | Factor: AP-2alpha; motif: GCCNNNRGS; match class: 4     |
| 2.54E-02 | TF:M00469_0    | Factor: AP-2alpha; motif: GCCNNNRGS; match class: 0     |
| 7.05E-05 | TF:M00196_4    | Factor: Sp1; motif: NGGGGGCGGGGYN; match class: 4       |
| 2.12E-05 | TF:M00196_3    | Factor: Sp1; motif: NGGGGGCGGGGYN; match class: 3       |
| 1.30E-05 | TF:M00196_2    | Factor: Sp1; motif: NGGGGGCGGGGYN; match class: 2       |
| 6.34E-03 | TF:M00196_1    | Factor: Sp1; motif: NGGGGGCGGGGYN; match class: 1       |
| 6.26E-03 | TF:M01073_3    | Factor: HIC1; motif: NNNGGKTGCCCSNNNNNN; match class: 3 |

|                      |                                                       |
|----------------------|-------------------------------------------------------|
| 6.34E-04 TF:M00189_4 | Factor: AP-2; motif: MKCCCSCNGGCG; match class: 4     |
| 1.24E-02 TF:M00915_4 | Factor: AP-2; motif: SNNNCCNCAGGCN; match class: 4    |
| 3.21E-03 TF:M00649_0 | Factor: MAZ; motif: GGGGAGGG; match class: 0          |
| 3.72E-02 TF:M01100_2 | Factor: LRF; motif: VNNRMCCCC; match class: 2         |
| 3.07E-02 TF:M01100_1 | Factor: LRF; motif: VNNRMCCCC; match class: 1         |
| 1.85E-04 TF:M01100_0 | Factor: LRF; motif: VNNRMCCCC; match class: 0         |
| 1.39E-05 TF:M00933_4 | Factor: Sp1; motif: CCCC GCCCCN; match class: 4       |
| 5.31E-05 TF:M00933_3 | Factor: Sp1; motif: CCCC GCCCCN; match class: 3       |
| 5.71E-03 TF:M00933_2 | Factor: Sp1; motif: CCCC GCCCCN; match class: 2       |
| 2.05E-03 TF:M00933_1 | Factor: Sp1; motif: CCCC GCCCCN; match class: 1       |
| 5.52E-03 TF:M00695_0 | Factor: ETF; motif: GVGGMGG; match class: 0           |
| 5.56E-03 TF:M00800_4 | Factor: AP-2; motif: GSCCSCRGGCNRNRNN; match class: 4 |
| 1.11E-03 TF:M00800_3 | Factor: AP-2; motif: GSCCSCRGGCNRNRNN; match class: 3 |
| 3.49E-04 TF:M00008_4 | Factor: Sp1; motif: GGGGCGGGGT; match class: 4        |
| 8.99E-04 TF:M00008_3 | Factor: Sp1; motif: GGGGCGGGGT; match class: 3        |
| 1.48E-02 TF:M00008_2 | Factor: Sp1; motif: GGGGCGGGGT; match class: 2        |

**Functional Enrichment Results, Fig 5 Black Cluster**

| <b>p-value</b> | <b>term ID</b> | <b>term name</b>                                     |
|----------------|----------------|------------------------------------------------------|
| 2.06E-02       | GO:0006605     | protein targeting                                    |
| 2.31E-02       | GO:0006612     | protein targeting to membrane                        |
| 3.81E-02       | GO:0010171     | body morphogenesis                                   |
| 4.25E-02       | GO:0060323     | head morphogenesis                                   |
| 3.55E-02       | GO:0048869     | cellular developmental process                       |
| 4.64E-02       | GO:0046907     | intracellular transport                              |
| 1.47E-02       | GO:0060271     | cilium morphogenesis                                 |
| 2.54E-02       | GO:0042384     | cilium assembly                                      |
| 3.91E-02       | GO:0000280     | nuclear division                                     |
| 3.91E-02       | GO:0007067     | mitosis                                              |
| 8.44E-03       | GO:0070727     | cellular macromolecule localization                  |
| 7.12E-03       | GO:0034613     | cellular protein localization                        |
| 4.32E-02       | GO:0033365     | protein localization to organelle                    |
| 9.61E-03       | GO:0072594     | establishment of protein localization to organelle   |
| 8.46E-03       | GO:0030219     | megakaryocyte differentiation                        |
| 7.68E-03       | GO:0045652     | regulation of megakaryocyte differentiation          |
| 1.89E-03       | GO:0045653     | negative regulation of megakaryocyte differentiation |
| 5.32E-11       | GO:0008152     | metabolic process                                    |
| 2.39E-06       | GO:0044238     | primary metabolic process                            |
| 3.66E-07       | GO:0071704     | organic substance metabolic process                  |
| 1.21E-09       | GO:1901360     | organic cyclic compound metabolic process            |
| 6.10E-09       | GO:0043170     | macromolecule metabolic process                      |
| 5.49E-11       | GO:0010467     | gene expression                                      |
| 3.65E-06       | GO:0009058     | biosynthetic process                                 |
| 2.11E-06       | GO:1901576     | organic substance biosynthetic process               |
| 4.25E-03       | GO:1901362     | organic cyclic compound biosynthetic process         |
| 2.53E-06       | GO:0009059     | macromolecule biosynthetic process                   |
| 5.52E-09       | GO:0006807     | nitrogen compound metabolic process                  |
| 5.59E-08       | GO:0009987     | cellular process                                     |
| 1.03E-13       | GO:0044237     | cellular metabolic process                           |
| 1.44E-12       | GO:0044260     | cellular macromolecule metabolic process             |
| 5.59E-11       | GO:0046483     | heterocycle metabolic process                        |
| 2.61E-11       | GO:0006725     | cellular aromatic compound metabolic process         |
| 1.49E-02       | GO:0006091     | generation of precursor metabolites and energy       |
| 6.72E-06       | GO:0006119     | oxidative phosphorylation                            |

|                     |                                                     |
|---------------------|-----------------------------------------------------|
| 1.22E-05 GO:0044249 | cellular biosynthetic process                       |
| 1.05E-03 GO:0018130 | heterocycle biosynthetic process                    |
| 6.70E-04 GO:0019438 | aromatic compound biosynthetic process              |
| 4.06E-06 GO:0034645 | cellular macromolecule biosynthetic process         |
| 2.78E-08 GO:0034641 | cellular nitrogen compound metabolic process        |
| 4.57E-03 GO:0044271 | cellular nitrogen compound biosynthetic process     |
| 2.24E-11 GO:0006139 | nucleobase-containing compound metabolic process    |
| 4.92E-11 GO:0090304 | nucleic acid metabolic process                      |
| 6.34E-08 GO:0016070 | RNA metabolic process                               |
| 2.87E-02 GO:0016071 | mRNA metabolic process                              |
| 6.63E-05 GO:0006396 | RNA processing                                      |
| 3.79E-02 GO:0006259 | DNA metabolic process                               |
| 2.49E-04 GO:0071103 | DNA conformation change                             |
| 8.26E-04 GO:0034654 | nucleobase-containing compound biosynthetic process |
| 1.53E-03 GO:0032774 | RNA biosynthetic process                            |
| 4.02E-02 GO:0006351 | transcription, DNA-dependent                        |
| 3.01E-02 GO:0019083 | viral transcription                                 |
| 2.15E-11 GO:0071840 | cellular component organization or biogenesis       |
| 7.57E-05 GO:0044085 | cellular component biogenesis                       |
| 4.69E-10 GO:0016043 | cellular component organization                     |
| 2.62E-02 GO:0043933 | macromolecular complex subunit organization         |
| 1.18E-06 GO:0071824 | protein-DNA complex subunit organization            |
| 1.36E-02 GO:0022607 | cellular component assembly                         |
| 2.18E-09 GO:0006996 | organelle organization                              |
| 2.87E-05 GO:0051276 | chromosome organization                             |
| 1.23E-02 GO:0032200 | telomere organization                               |
| 1.05E-02 GO:0000723 | telomere maintenance                                |
| 1.73E-04 GO:0006325 | chromatin organization                              |
| 1.38E-04 GO:0034728 | nucleosome organization                             |
| 1.90E-04 GO:0006333 | chromatin assembly or disassembly                   |
| 1.38E-04 GO:0034724 | DNA replication-independent nucleosome organization |
| 3.63E-02 GO:0016568 | chromatin modification                              |
| 4.41E-03 GO:0006338 | chromatin remodeling                                |
| 2.61E-04 GO:0031055 | chromatin remodeling at centromere                  |
| 6.45E-04 GO:0043044 | ATP-dependent chromatin remodeling                  |
| 8.36E-04 GO:0043486 | histone exchange                                    |

|          |            |                                                                         |
|----------|------------|-------------------------------------------------------------------------|
| 9.27E-04 | GO:0006323 | DNA packaging                                                           |
| 5.52E-05 | GO:0031497 | chromatin assembly                                                      |
| 3.20E-04 | GO:0034622 | cellular macromolecular complex assembly                                |
| 2.62E-07 | GO:0065004 | protein-DNA complex assembly                                            |
| 3.87E-04 | GO:0034508 | centromere complex assembly                                             |
| 3.57E-05 | GO:0006334 | nucleosome assembly                                                     |
| 1.38E-04 | GO:0006336 | DNA replication-independent nucleosome assembly                         |
| 1.38E-04 | GO:0034080 | CENP-A containing nucleosome assembly at centromere                     |
| 2.93E-02 | GO:0048519 | negative regulation of biological process                               |
| 3.76E-02 | GO:0048523 | negative regulation of cellular process                                 |
| 1.35E-02 | GO:0019222 | regulation of metabolic process                                         |
| 5.24E-03 | GO:0060255 | regulation of macromolecule metabolic process                           |
| 3.43E-04 | GO:0010468 | regulation of gene expression                                           |
| 5.04E-03 | GO:0009889 | regulation of biosynthetic process                                      |
| 2.33E-03 | GO:0010556 | regulation of macromolecule biosynthetic process                        |
| 4.25E-02 | GO:0080090 | regulation of primary metabolic process                                 |
| 1.50E-02 | GO:0051171 | regulation of nitrogen compound metabolic process                       |
| 1.12E-03 | GO:0009892 | negative regulation of metabolic process                                |
| 1.21E-03 | GO:0051172 | negative regulation of nitrogen compound metabolic process              |
| 3.34E-04 | GO:0010605 | negative regulation of macromolecule metabolic process                  |
| 8.80E-03 | GO:0010629 | negative regulation of gene expression                                  |
| 5.54E-04 | GO:0009890 | negative regulation of biosynthetic process                             |
| 1.24E-04 | GO:0010558 | negative regulation of macromolecule biosynthetic process               |
| 3.13E-02 | GO:0031323 | regulation of cellular metabolic process                                |
| 8.68E-03 | GO:0031326 | regulation of cellular biosynthetic process                             |
| 3.76E-03 | GO:2000112 | regulation of cellular macromolecule biosynthetic process               |
| 5.65E-03 | GO:0019219 | regulation of nucleobase-containing compound metabolic process          |
| 2.34E-02 | GO:0051252 | regulation of RNA metabolic process                                     |
| 4.77E-02 | GO:0051254 | positive regulation of RNA metabolic process                            |
| 8.67E-03 | GO:0031324 | negative regulation of cellular metabolic process                       |
| 5.78E-04 | GO:0031327 | negative regulation of cellular biosynthetic process                    |
| 4.38E-04 | GO:2000113 | negative regulation of cellular macromolecule biosynthetic process      |
| 1.31E-03 | GO:0045934 | negative regulation of nucleobase-containing compound metabolic process |
| 2.63E-03 | GO:0051253 | negative regulation of RNA metabolic process                            |
| 4.12E-07 | GO:0022900 | electron transport chain                                                |
| 3.75E-04 | GO:0015980 | energy derivation by oxidation of organic compounds                     |



|          |            |                                                        |
|----------|------------|--------------------------------------------------------|
| 4.15E-08 | GO:0045333 | cellular respiration                                   |
| 2.89E-10 | GO:0022904 | respiratory electron transport chain                   |
| 9.34E-06 | GO:0042773 | ATP synthesis coupled electron transport               |
| 9.34E-06 | GO:0042775 | mitochondrial ATP synthesis coupled electron transport |
| 7.69E-06 | GO:0006120 | mitochondrial electron transport, NADH to ubiquinone   |
| 1.78E-02 | GO:0044267 | cellular protein metabolic process                     |
| 1.11E-02 | GO:0006412 | translation                                            |
| 5.82E-21 | GO:0043226 | organelle                                              |
| 1.75E-10 | GO:0043228 | non-membrane-bounded organelle                         |
| 2.60E-17 | GO:0043227 | membrane-bounded organelle                             |
| 9.68E-09 | GO:0032991 | macromolecular complex                                 |
| 6.87E-04 | GO:0032993 | protein-DNA complex                                    |
| 1.14E-11 | GO:0031974 | membrane-enclosed lumen                                |
| 7.08E-04 | GO:0005623 | cell                                                   |
| 6.94E-04 | GO:0044464 | cell part                                              |
| 1.98E-04 | GO:0031975 | envelope                                               |
| 1.44E-20 | GO:0005622 | intracellular                                          |
| 8.39E-22 | GO:0044424 | intracellular part                                     |
| 5.39E-10 | GO:0005737 | cytoplasm                                              |
| 2.37E-04 | GO:0030529 | ribonucleoprotein complex                              |
| 2.13E-21 | GO:0043229 | intracellular organelle                                |
| 1.75E-10 | GO:0043232 | intracellular non-membrane-bounded organelle           |
| 3.64E-03 | GO:0005694 | chromosome                                             |
| 1.79E-17 | GO:0043231 | intracellular membrane-bounded organelle               |
| 1.55E-10 | GO:0005634 | nucleus                                                |
| 1.69E-04 | GO:0044444 | cytoplasmic part                                       |
| 5.99E-05 | GO:0005739 | mitochondrion                                          |
| 8.91E-03 | GO:0005840 | ribosome                                               |
| 1.54E-15 | GO:0044422 | organelle part                                         |
| 1.23E-10 | GO:0043233 | organelle lumen                                        |
| 3.37E-16 | GO:0044446 | intracellular organelle part                           |
| 2.74E-11 | GO:0070013 | intracellular organelle lumen                          |
| 1.59E-04 | GO:0031967 | organelle envelope                                     |
| 1.06E-03 | GO:0019866 | organelle inner membrane                               |
| 2.09E-09 | GO:0044428 | nuclear part                                           |
| 5.07E-11 | GO:0031981 | nuclear lumen                                          |

|                        |                                                                                     |
|------------------------|-------------------------------------------------------------------------------------|
| 1.37E-08 GO:0005654    | nucleoplasm                                                                         |
| 2.72E-03 GO:0044451    | nucleoplasm part                                                                    |
| 1.02E-03 GO:0005730    | nucleolus                                                                           |
| 1.08E-06 GO:0044429    | mitochondrial part                                                                  |
| 3.93E-05 GO:0005740    | mitochondrial envelope                                                              |
| 1.01E-05 GO:0030964    | NADH dehydrogenase complex                                                          |
| 3.76E-05 GO:0070469    | respiratory chain                                                                   |
| 1.01E-05 GO:0045271    | respiratory chain complex I                                                         |
| 4.58E-05 GO:0000786    | nucleosome                                                                          |
| 3.65E-05 GO:0031966    | mitochondrial membrane                                                              |
| 7.35E-06 GO:0044455    | mitochondrial membrane part                                                         |
| 1.27E-03 GO:0005743    | mitochondrial inner membrane                                                        |
| 2.29E-05 GO:0005746    | mitochondrial respiratory chain                                                     |
| 1.01E-05 GO:0005747    | mitochondrial respiratory chain complex I                                           |
| 2.54E-02 GO:1901363    | heterocyclic compound binding                                                       |
| 4.21E-02 GO:0097159    | organic cyclic compound binding                                                     |
| 1.13E-04 GO:0003676    | nucleic acid binding                                                                |
| 8.79E-04 GO:0003723    | RNA binding                                                                         |
| 1.14E-02 GO:0005515    | protein binding                                                                     |
| 3.45E-02 GO:0003712    | transcription cofactor activity                                                     |
| 4.38E-02 GO:0000988    | protein binding transcription factor activity                                       |
| 2.27E-02 GO:0016651    | oxidoreductase activity, acting on NAD(P)H                                          |
| 8.68E-07 GO:0003954    | NADH dehydrogenase activity                                                         |
| 7.86E-05 GO:0016655    | oxidoreductase activity, acting on NAD(P)H, quinone or similar compound as acceptor |
| 8.68E-07 GO:0050136    | NADH dehydrogenase (quinone) activity                                               |
| 8.68E-07 GO:0008137    | NADH dehydrogenase (ubiquinone) activity                                            |
| 2.36E-20 BIOGRID:00000 | BioGRID interaction data                                                            |
| 9.81E-03 CORUM:3137    | MASH1 promoter-coactivator complex                                                  |
| 3.93E-03 CORUM:1227    | H2AX complex II                                                                     |
| 1.28E-04 CORUM:178     | Respiratory chain complex I (holoenzyme), mitochondrial                             |
| 1.33E-02 CORUM:1149    | Histone H3.1 complex                                                                |
| 3.16E-02 CORUM:1223    | H2AX complex, isolated from cells without IR exposure                               |
| 5.13E-06 CORUM:2914    | Respiratory chain complex I (beta subunit) mitochondrial                            |
| 4.07E-02 CORUM:1150    | Histone H3.3 complex                                                                |
| 5.58E-03 HP:0002921    | Abnormality of the cerebrospinal fluid                                              |
| 2.37E-04 HP:0002490    | Increased CSF lactate                                                               |

|                            |                                                                                                                |
|----------------------------|----------------------------------------------------------------------------------------------------------------|
| 1.55E-02 HP:0002553        | Highly arched eyebrow                                                                                          |
| 1.43E-03 HP:0001427        | Mitochondrial inheritance                                                                                      |
| 3.08E-03 KEGG:03010        | Ribosome                                                                                                       |
| 2.51E-07 KEGG:05012        | Parkinson's disease                                                                                            |
| 6.17E-06 KEGG:05010        | Alzheimer's disease                                                                                            |
| 2.68E-02 KEGG:05203        | Viral carcinogenesis                                                                                           |
| 1.88E-07 KEGG:00190        | Oxidative phosphorylation                                                                                      |
| 1.06E-08 KEGG:05016        | Huntington's disease                                                                                           |
| 1.46E-03 KEGG:05034        | Alcoholism                                                                                                     |
| 1.60E-03 MI:hsa-miR-590-3p | MI:hsa-miR-590-3p                                                                                              |
| 6.88E-04 REAC:157579       | Telomere Maintenance                                                                                           |
| 3.77E-03 REAC:171306       | Packaging Of Telomere Ends                                                                                     |
| 3.77E-03 REAC:176700       | Incorporation Of Extended And Processed Telomere End Into Higher Order T-Loop And Associated Protein Structure |
| 3.77E-03 REAC:181450       | Incorporation Of Extended And Processed Telomere End Into Associated Protein Structure                         |
| 1.24E-04 REAC:163685       | Integration of energy metabolism                                                                               |
| 6.89E-05 REAC:381150       | Diabetes pathways                                                                                              |
| 6.99E-06 REAC:265764       | Glucose Regulation of Insulin Secretion                                                                        |
| 1.00E-07 REAC:163200       | Electron Transport Chain                                                                                       |
| 4.93E-06 REAC:163217       | NADH enters the respiratory chain at Complex I                                                                 |
| 1.96E-02 TF:M00428_4       | Factor: E2F-1; motif: NKTSSCGC; match class: 4                                                                 |
| 2.38E-02 TF:M01035_0       | Factor: YY1; motif: NYNKCCATNTT; match class: 0                                                                |
| 1.39E-02 TF:M00803_0       | Factor: E2F; motif: GGCGSG; match class: 0                                                                     |
