# Supplementary material for: Molecular characterization of systemic sclerosis esophageal pathology identifies inflammatory and proliferative signatures
Source: PubMed Central journal article supplement (PMC4518531; doi:10.1186/s13075-015-0695-1), 2015-07-29
Supplement: 13075_2015_695_MOESM14_ESM.pdf [file 13075_2015_695_MOESM14_ESM.pdf]

**Table S3:** Esophageal histological scoring and endoscopy findings

| Study Code      | Age**/<br>Sex | Date of Biopsy | Diagnosis       | Fibrosis | Basal cell hyperplasia | Inflammation | Endoscopy                      |
|-----------------|---------------|----------------|-----------------|----------|------------------------|--------------|--------------------------------|
| Eso1            | 50/F          | 10/20/2010     | Schatzki's ring | NApp     | 0                      | 8            | Schatzki's                     |
|                 |               |                |                 | 2        | 1                      | 12           |                                |
| Eso2-lower      | 78/F          | 12/9/2010      | Lupus/GER       | NA       |                        |              | Barrett's, hiatal hernia       |
| Eso3-upper      | 45/F          | 12/16/2010     | Anemia          | NA       | NA                     | NA           | Erythema                       |
| Eso4-lower      | 24/M          | 2/10/2011      | GER             | NApp     | 0                      | 6            | Reactive epithelial Δ          |
| Eso5            | 31/F          | 3/24/2011      | SpA/GER         | NA       |                        |              | Hiatal hernia                  |
| Eso6-lower      | 34/M          | 1/11/2012      | GER             | 1        | 1                      | 22           | Reactive epithelial Δ          |
| Eso7            | 24/F          | 1/12/2012      | GER             | NApp     | 0                      | 7            | Reactive epithelial Δ          |
|                 |               |                |                 | NApp     | 1                      | 8            |                                |
| dSScEso1*       | 52/F          | 3/23/2010      | dcSSc           | NApp     | 1                      | 3            | GAVE                           |
|                 |               |                |                 | NApp     | 0                      | 0            |                                |
| dSScEso2-lower  | 30/F          | 9/9/2010       | dcSSc           | 1        | 1                      | 2            | Barrett's                      |
| dSScEso3        | 49/F          | 3/24/2010      | dcSSc           | NApp     | 0                      | 8            | Hiatal hernia, stricture       |
|                 |               |                |                 | 1        | 1                      | 3            |                                |
| ISScEso4        | 53/F          | 9/8/2010       | lcSSc           | NApp     | 1                      | 6            | Hiatal hernia, stricture       |
|                 |               |                |                 | NApp     | 1                      | 10           |                                |
| ISScEso5        | 58/F          | 9/30/2010      | lcSSc           | NApp     | 0                      | 1            | Hiatal hernia                  |
|                 |               |                |                 | NApp     | 0                      | 3            |                                |
| ISScEso6        | 63/M          | 10/14/2010     | lcSSc           | NApp     | 0                      | 0            | Candida esophagitis, stricture |
|                 |               |                |                 | 3        | 2                      | 5            |                                |
| dSScEso8-lower  | 50/F          | 10/20/2010     | dcSSc           | 1        | 1                      | 19           | Reflux esophagitis             |
| ISScEso9-upper  | 52/F          | 2/16/2011      | lcSSc           | 1        | 1                      | 14           | Reactive epithelial Δ          |
| dSScEso11-lower | 68/F          | 2/16/2011      | dcSSc           | 2        | 1                      | 25           | Candida esophagitis            |
| dSScEso12       | 49/F          | 4/20/2011      | dcSSc           | NA       |                        |              | GAVE                           |

|                   |      |            |       |      |   |    |                       |
|-------------------|------|------------|-------|------|---|----|-----------------------|
| IScEso13-unknown  | 47/F | 11/22/2011 | lcSSc | NApp | 1 | 7  | Reactive epithelial Δ |
| dSScEso14-lower   | 46/F | 1/9/2012   | dcSSc | 1    | 0 | 4  | Reactive epithelial Δ |
| dSScEso15-unknown | 50/F | 1/25/2012  | dcSSc | 1    | 1 | 6  | Reactive epithelial Δ |
| dSScEso17         | 67/F | 8/1/2012   | dcSSc | NA   |   |    |                       |
| dSScEso18         | 51/F | 8/9/2012   | dcSSc | NA   |   |    | Hiatal hernia         |
| dSScEso19-lower   | 51/F | 9/26/2012  | dcSSc | 1    | 2 | 27 |                       |

\* indicates subject had baseline and 6mo follow-up biopsies, \*\*subject age at the time of biopsy.  
GER=gastroesophageal reflux disease, NApp=Not applicable, NA=not available, SpA=spondyloarthropathy,  
dSSc= diffuse cutaneous systemic sclerosis (SSc), lSSc=limited cutaneous SSc. Split cells per patient indicate  
upper and lower esophageal biopsies were performed. One cell per patient indicates lower or upper esophageal  
biopsies were performed as indicated. GAVE=gastric antral vascular ectasia syndrome (watermelon stomach).
